# Supplementary material for: Effect of prematurity on genome wide methylation in the placenta
Source: BMC Med Genet. 2019 Jun 28;20:116. doi: 10.1186/s12881-019-0835-6 (PMC6599230; doi:10.1186/s12881-019-0835-6)
Supplement: Supplementary file 2 — DMRs Associated with Preterm Birth. A tab delimitated table containing information for each DMR that was found to be associated to preterm birth with p < .01. The columns contain: Chromosome, DMR start location, DMR end location, with of DMR, base expression, log2FoldChange, p value, functional annotation and annotated nearest gene. (XLSX 55 kb) [file 12881_2019_835_MOESM2_ESM.xlsx]

## Sheet: Sheet1
DMRs Associated with Preterm Birth
Chromosome	DMR Start	DMR End	Width	baseMean	log2FoldChange	pvalue	Annotation	Nearest Gene
chr10	1281020	1282852	1833	614.669	-1.39475	5.72032e-07	Intron (uc009xhq.3/105, intron 5 of 9)	ADARB2
chr22	29515431	29517126	1696	2125.02	-0.748696	9.16244e-07	Intron (uc003ael.3/83999, intron 3 of 8)	KREMEN1
chr2	60693763	60695701	1939	293.887	-0.966529	3.82738e-06	Intron (uc002sab.3/53335, intron 2 of 4)	BCL11A
chr1	16888160	16896002	7843	1691.3	0.664717	8.28052e-05	3' UTR	MIR3675
chr15	22741829	22744210	2382	1025.05	-1.02204	4.52339e-05	Exon (uc010tzx.1/283767, exon 8 of 9)	GOLGA6L1
chr15	32781661	32783301	1641	391.249	-0.568565	5.45082e-05	Distal Intergenic	GOLGA8O
chr17	21901996	21907966	5971	1435.13	1.262	7.82726e-05	Promoter (<=1kb)	FLJ36000
chr19	24622361	24624613	2253	338.039	1.23414	4.23165e-05	Distal Intergenic	HAVCR1P1
chr19	37783157	37788148	4992	786.565	1.76808	7.21887e-05	Distal Intergenic	HKR1
chr2	92280420	92282186	1767	1109.5	1.02754	5.07768e-05	Distal Intergenic	ACTR3BP2
chr20	20317317	20318796	1480	713.282	-0.666266	7.34576e-05	Intron (uc002wru.3/26074, intron 25 of 26)	INSM1
chr9	73946029	73947394	1366	290.204	-0.648682	0.000122042	Intron (uc004aii.3/80036, intron 5 of 5)	TRPM3
chr18	15404550	15410901	6352	972.993	1.68787	0.000160249	Distal Intergenic	LOC644669
chr2	92289473	92292822	3350	4738.84	1.06026	0.000190929	Distal Intergenic	ACTR3BP2
chr1	16932178	16936537	4360	710.057	0.489202	0.000423865	5' UTR	NBPF1
chr2	90371420	90374495	3076	1492.05	1.02136	0.000403599	Intron (uc031rom.1/uc031rom.1, intron 40 of 41)	MIR4436A
chr2	90374620	90378951	4332	2470.99	1.01001	0.000412058	Intron (uc031rom.1/uc031rom.1, intron 40 of 41)	MIR4436A
chr2	91595933	91600986	5054	2660.11	0.993924	0.00038763	Distal Intergenic	LOC654342
chr5	180899896	180903257	3362	290.831	0.778464	0.000312366	Distal Intergenic	OR4F16
chr7	158998337	159000338	2002	314.576	-0.727055	0.000427431	Distal Intergenic	VIPR2
chr8	43792849	43795213	2365	1959.95	1.11252	0.00041363	Distal Intergenic	POTEA
chr7	15223274	15225157	1884	555.787	-0.58991	0.000475284	Distal Intergenic	DGKB
chr2	92304910	92314450	9541	25091.3	1.07	0.000560715	Distal Intergenic	ACTR3BP2
chr1	143538645	143541402	2758	436.261	0.882133	0.000610754	Distal Intergenic	NA
chr2	92294964	92300499	5536	4633.96	1.0134	0.000624863	Distal Intergenic	ACTR3BP2
chr1	228779763	228782056	2294	447.996	0.688941	0.000811159	Promoter (<=1kb)	DUSP5P1
chr10	42657688	42663025	5338	706.605	0.754451	0.000815432	Distal Intergenic	LOC441666
chr2	90380983	90382232	1250	703.058	1.01636	0.000691935	Intron (uc031rom.1/uc031rom.1, intron 40 of 41)	MIR4436A
chr2	90390889	90393740	2852	1224.86	0.949889	0.000855417	Intron (uc031rom.1/uc031rom.1, intron 40 of 41)	MIR4436A
chr2	90477658	90483367	5710	817.576	0.86276	0.000721352	Distal Intergenic	LOC654342
chr2	91603907	91606341	2435	1002.44	1.04514	0.000824099	Distal Intergenic	LOC654342
chr4	64143	69035	4893	647.865	0.977224	0.00079435	3' UTR	ZNF595
chr8	43830418	43838886	8469	8095.06	1.06585	0.000854987	Distal Intergenic	POTEA
chr2	91612382	91616166	3785	1387.45	0.908197	0.000975821	Distal Intergenic	LOC654342
chr7	158509262	158511170	1909	785.42	-0.544875	0.00102515	Distal Intergenic	NCAPG2
chrY	59027086	59033404	6319	757.989	0.903122	0.00101888	Distal Intergenic	SPRY3
chr10	42639383	42642799	3417	471.938	0.612448	0.00108392	Distal Intergenic	LOC441666
chr7	61802862	61805203	2342	283.308	0.928741	0.00115202	Distal Intergenic	ZNF733P
chr5	49428378	49432607	4230	1837.6	1.03024	0.00118294	Distal Intergenic	EMB
chr3	196625150	196626329	1180	5459.85	1.0074	0.00126356	Intron (uc003fwz.4/205564, intron 2 of 9)	SENP5
chr4	190153638	190157089	3452	2730.16	-3.16631	0.00128126	Distal Intergenic	FRG1
chr1	161411316	161417356	6041	980.018	0.645456	0.00158336	Exon (uc021pcd.1/uc021pcd.1, exon 1 of 1)	FCGR2A
chr1	228766682	228767690	1009	301.596	0.847413	0.00149827	Distal Intergenic	DUSP5P1
chr5	17591867	17598395	6529	1095.37	0.824538	0.00162996	Distal Intergenic	LOC401177
chr8	143302533	143305491	2959	708.699	-0.556178	0.00162576	Intron (uc003ywj.3/203062, intron 1 of 12)	LINC00051
chrY	9943269	9946476	3208	377.936	0.80602	0.00152816	Distal Intergenic	TTTY23
chrY	13472965	13475348	2384	562.76	1.00825	0.00173136	Distal Intergenic	GYG2P1
chr15	28804352	28807049	2698	1194.78	-0.4229	0.00180292	5' UTR	GOLGA8F
chr5	176297348	176300638	3291	621.255	-0.48842	0.00184083	3' UTR	UNC5A
chr1	142569947	142574490	4544	639.076	0.790259	0.00198985	Distal Intergenic	ANKRD20A12P
chr2	133004904	133009968	5065	662.441	0.872902	0.00206395	Intron (uc002ttj.3/554226, intron 4 of 4)	MIR663B
chr18	74729573	74731456	1884	483.431	-0.408311	0.00214814	Promoter (<=1kb)	MBP
chr9	68393284	68394653	1370	276.528	0.818612	0.0021581	Distal Intergenic	FRG1JP
chr11	69966811	69969377	2567	1038.3	-0.46927	0.00225071	Intron (uc001opj.3/55107, intron 8 of 25)	ANO1
chr2	33091444	33092205	762	418.661	0.576501	0.00248299	Intron (uc002roo.2/285045, intron 2 of 5)	LINC00486
chr4	2337910	2339336	1427	338.715	-0.701435	0.00239976	Exon (uc003gew.2/57732, exon 2 of 10)	ZFYVE28
chr5	49415137	49417649	2513	629.627	0.966109	0.00248945	Distal Intergenic	EMB
chr5	49434813	49441568	6756	3582.6	0.959337	0.00242432	Distal Intergenic	EMB
chrY	13460018	13461751	1734	481.378	0.962944	0.0024269	Distal Intergenic	GYG2P1
chr10	132587892	132590420	2529	522.934	-0.463521	0.00254312	Distal Intergenic	MIR378C
chr16	32826142	32829194	3053	407.625	0.649847	0.00261697	Distal Intergenic	SLC6A10P
chrX	5815244	5816904	1661	294.115	-0.757415	0.00262874	Intron (uc004crp.3/57502, intron 1 of 5)	NLGN4X
chr20	25734331	25736757	2427	299.595	0.756023	0.00274821	Distal Intergenic	FAM182B
chr7	61082907	61084759	1853	318.044	0.85052	0.00292235	Distal Intergenic	ZNF733P
chr5	17517379	17530086	12708	2284.69	0.809011	0.00300879	Distal Intergenic	LOC401177
chr10	127579483	127584720	5238	732.282	0.744282	0.00315165	Promoter (<=1kb)	DHX32
chr2	96615507	96618616	3110	319.922	0.81721	0.00341496	Exon (uc010yug.1/uc010yug.1, exon 15 of 27)	FAHD2CP
chrY	10041892	10044852	2961	532.802	0.902141	0.00345609	Distal Intergenic	TTTY23
chr1	148675729	148677960	2232	293.87	0.806361	0.00445975	Distal Intergenic	PPIAL4E
chr1	149031401	149035972	4572	724.771	0.798054	0.00409878	Distal Intergenic	LOC645166
chr10	42596615	42601848	5234	96981	0.937329	0.00450956	Distal Intergenic	LOC441666
chr10	134878561	134880844	2284	289.137	-0.774417	0.00382813	Distal Intergenic	ADGRA1
chr11	1069275	1070940	1666	275.32	-0.668587	0.00428712	Distal Intergenic	MUC2
chr12	117759234	117761187	1954	733.374	-0.529966	0.004461	Intron (uc001twm.2/4842, intron 27 of 28)	NOS1
chr16	32843781	32852402	8622	1914.62	0.757325	0.00469164	Distal Intergenic	SLC6A10P
chr16	33981331	33985622	4292	970.397	0.888482	0.00428255	Distal Intergenic	LINC00273
chr17	36403117	36406324	3208	349.262	0.72736	0.00450941	Intron (uc002hpx.2/440434, intron 5 of 6)	LOC440434
chr18	106261	111600	5340	6033.24	0.863818	0.00387029	Promoter (<=1kb)	ROCK1P1
chr2	131964952	131967057	2106	410.748	-0.452335	0.00405245	Intron (uc002tsh.2/55041, intron 6 of 6)	POTEE
chr2	132797937	132800593	2657	355.489	0.493516	0.00461775	Distal Intergenic	ANKRD30BL
chr21	9826579	9834735	8157	2065.52	0.604516	0.00455547	Promoter (<=1kb)	MIR3687-1
chr21	10730608	10736566	5959	1010.63	0.927511	0.00389308	Distal Intergenic	TPTE
chr4	9214692	9219763	5072	441.843	0.670288	0.00431492	Promoter (<=1kb)	USP17L11
chr4	9265567	9268813	3247	285.406	0.84294	0.00429858	Promoter (<=1kb)	USP17L20
chr4	68263877	68267166	3290	2802.12	0.889572	0.00475274	Distal Intergenic	CENPC
chr5	172145043	172146642	1600	283.15	-0.425442	0.00391577	Distal Intergenic	DUSP1
chr9	43157895	43160792	2898	440.631	-0.530486	0.0038691	Distal Intergenic	LOC642929
chr9	66489789	66491770	1982	333.113	0.806998	0.00376952	Distal Intergenic	PTGER4P2-CDK2AP2P2
chrY	9950387	9952984	2598	422.748	0.733843	0.00470793	Distal Intergenic	TTTY23
chrY	13481575	13487232	5658	1869.98	0.873635	0.0036254	Distal Intergenic	GYG2P1
chr15	20739055	20741355	2301	720.241	-0.547532	0.00489483	Exon (uc021sex.1/uc021sex.1, exon 1 of 1)	GOLGA6L6
chr7	61054541	61056798	2258	351.927	0.788004	0.00501011	Distal Intergenic	ZNF733P
chrY	13464362	13469896	5535	1796.09	0.87267	0.00521711	Distal Intergenic	GYG2P1
chr1	2775173	2776643	1471	300.314	-0.511762	0.00600535	Distal Intergenic	TTC34
chr1	201224497	201228143	3647	1535.97	-0.467148	0.00603192	Distal Intergenic	PKP1
chr10	135499689	135501749	2061	584.813	0.802801	0.00547499	Downstream (1-2kb)	DUX4L3
chr14	106130891	106133431	2541	327.587	-0.515554	0.00559001	Intron (uc031qqx.1/uc031qqx.1, intron 15 of 4910)	ELK2AP
chr18	15173224	15175591	2368	315.2	0.774925	0.00595612	Distal Intergenic	LOC644669
chr2	92322257	92326207	3951	16129.2	1.18133	0.00561712	Distal Intergenic	ACTR3BP2
chr21	10742287	10745376	3090	625.807	0.895886	0.00593039	Distal Intergenic	TPTE
chr5	21478544	21483981	5438	579.057	0.668219	0.00581053	Exon (uc021xwv.1/uc021xwv.1, exon 1 of 1)	GUSBP1
chr5	49409519	49410620	1102	392.214	0.858049	0.00575713	Distal Intergenic	EMB
chr6	58775747	58780286	4540	59219.2	0.849068	0.0058043	Distal Intergenic	GUSBP4
chr7	61738068	61741345	3278	476.714	0.473778	0.00615427	Distal Intergenic	ZNF733P
chr2	90454066	90456710	2645	356.489	0.619519	0.00630693	Intron (uc031rom.1/uc031rom.1, intron 40 of 41)	MIR4436A
chrY	9930866	9933680	2815	316.15	0.740042	0.00630718	Distal Intergenic	TTTY23
chr1	142781032	142782917	1886	307.168	0.760721	0.00637116	Intron (uc001eiw.1/uc001eiw.1, intron 1 of 7)	ANKRD20A12P
chr10	134987426	134990295	2870	856.361	-0.437333	0.00708506	Intron (uc001llz.1/85442, intron 3 of 29)	KNDC1
chr11	51578781	51581392	2612	5862.83	1.21166	0.00692127	Distal Intergenic	OR4C46
chr17	7077530	7080531	3002	571.297	-0.425777	0.00708227	Promoter (<=1kb)	ASGR1
chr18	77678957	77682554	3598	740.291	-0.557059	0.00701248	Exon (uc010dre.2/80148, exon 5 of 6)	PQLC1
chr20	29581797	29585889	4093	663.656	0.746765	0.00688419	Distal Intergenic	FRG1BP
chr4	9876	10674	799	300.733	-0.617587	0.00704037	Distal Intergenic	ZNF595
chr4	9096004	9100729	4726	287.074	0.539671	0.00707799	Distal Intergenic	USP17L10
chr4	23165223	23166862	1640	279.559	-0.445718	0.006887	Distal Intergenic	GBA3
chr7	61814268	61820942	6675	1252.62	0.686465	0.0068334	Distal Intergenic	ZNF733P
chr7	152098953	152103138	4186	626.889	0.778913	0.00703123	Intron (uc003wla.3/58508, intron 58 of 58)	KMT2C
chr7	158144095	158145542	1448	453.394	-0.653873	0.00657004	Intron (uc011kwa.2/5799, intron 21 of 22)	MIR595
chr8	145054948	145056621	1674	467.108	-0.819309	0.00699922	Promoter (2-3kb)	PARP10
chr20	20276154	20277702	1549	509.398	-0.568052	0.00723393	Intron (uc002wru.3/26074, intron 24 of 26)	CFAP61
chr21	11148067	11153388	5322	1219.69	0.72726	0.00719035	Distal Intergenic	BAGE
chr9	66470317	66474513	4197	945.841	0.70716	0.00758854	Distal Intergenic	PTGER4P2-CDK2AP2P2
chr1	91852370	91853464	1095	282.832	0.771426	0.00787459	Intron (uc001doa.4/164045, intron 35 of 38)	HFM1
chr14	94213176	94214970	1795	274.905	-0.452533	0.00805501	Intron (uc001ybw.1/145270, intron 2 of 4)	PRIMA1
chr15	56071748	56073363	1616	280.282	-0.430902	0.00796082	Distal Intergenic	PRTG
chr9	69710457	69711869	1413	915.964	0.777638	0.00792409	Distal Intergenic	LOC100133920
chrX	148615983	148617887	1905	496.835	-0.697078	0.00791304	Promoter (<=1kb)	IDS
chr16	32489998	32492495	2498	296.319	0.676913	0.00823605	Distal Intergenic	LOC390705
chr1	142916524	142919340	2817	334.19	0.761732	0.00881017	Intron (uc001eiw.1/uc001eiw.1, intron 1 of 7)	ANKRD20A12P
chr1	228743911	228750550	6640	1286.06	0.601201	0.00865327	Distal Intergenic	DUSP5P1
chr14	77322209	77324017	1809	358.473	-0.379806	0.00845129	Exon (uc001xsx.2/145497, exon 10 of 14)	LRRC74A
chr20	37523845	37525568	1724	470.09	-0.383642	0.00862529	Exon (uc002xje.3/26051, exon 4 of 11)	FAM83D
chr21	9449780	9452594	2815	298.391	0.6369	0.00868869	Distal Intergenic	MIR3648-1
chr3	195825234	195827503	2270	478.45	-0.610695	0.00881247	Distal Intergenic	TFRC
chr7	35083301	35086409	3109	667.035	-0.634182	0.00863053	Exon (uc003teo.1/uc003teo.1, exon 1 of 1)	DPY19L1
chr7	61823453	61826041	2589	545.045	0.584386	0.00878564	Distal Intergenic	ZNF733P
chr8	27426563	27428394	1832	618.559	-0.457268	0.00872362	Distal Intergenic	CLU
chr10	127939584	127941428	1845	698.433	-0.346307	0.00927195	Intron (uc001ljk.2/8038, intron 20 of 22)	ADAM12
chr21	10151671	10155320	3650	476.848	0.673687	0.00920733	Distal Intergenic	TEKT4P2
chr3	195438946	195441813	2868	1657.74	-0.750165	0.0091388	Distal Intergenic	MUC20
chr8	143824285	143827190	2906	872.611	-0.546753	0.00923192	Promoter (<=1kb)	SLURP1
chr19	10116932	10119111	2180	360.892	-0.345683	0.00950689	Promoter (2-3kb)	COL5A3
chr19	15922618	15925197	2580	575.398	-0.521821	0.0097916	Distal Intergenic	OR10H1
chr19	3528250	3531110	2861	839.226	-0.381547	0.0099403	Exon (uc002lxt.2/51343, exon 8 of 14)	FZR1
chr9	133329464	133331389	1926	456.508	-0.356402	0.00988796	Exon (uc004bzm.3/445, exon 4 of 16)	ASS1
chr1	1034254	1035441	1188	73.0767	1.26715	0.000429642	Intron (uc001acr.2/54991, intron 11 of 11)	C1orf159
chr1	2620955	2623194	2240	172.672	1.17429	0.00010366	Intron (uc021oey.1/100287898, intron 3 of 6)	MMEL1
chr1	2765306	2766469	1164	83.8652	0.533445	0.00900878	Distal Intergenic	TTC34
chr1	16839159	16840851	1693	168.572	0.711535	0.000743259	Distal Intergenic	CROCCP3
chr1	37221581	37222695	1115	88.9647	-0.7364	0.000334855	Distal Intergenic	CSF3R
chr1	40440109	40440903	795	57.398	0.63068	0.00513637	Distal Intergenic	MFSD2A
chr1	46491694	46492821	1128	65.7234	0.69502	0.00951325	Intron (uc001cov.3/23139, intron 16 of 28)	MAST2
chr1	60265747	60266761	1015	81.4573	0.65172	0.00124238	Distal Intergenic	HOOK1
chr1	78313263	78314572	1310	85.8579	0.622915	0.00686796	Intron (uc001dhx.4/374986, intron 8 of 15)	NEXN
chr1	79495552	79496467	916	55.4133	0.549469	0.00922491	Distal Intergenic	ADGRL4
chr1	85234073	85235011	939	53.826	0.735926	0.00826143	Distal Intergenic	SSX2IP
chr1	107934759	107935819	1061	65.9437	0.601514	0.00375546	Promoter (1-2kb)	NTNG1
chr1	114716139	114717172	1034	78.3191	0.567552	0.00439958	Distal Intergenic	SYT6
chr1	120632377	120633930	1554	164.419	0.660618	0.00169903	Distal Intergenic	NOTCH2
chr1	121426265	121427479	1215	173.681	1.05841	0.00159225	Distal Intergenic	EMBP1
chr1	121471445	121472279	835	107.016	0.840362	0.00733742	Distal Intergenic	EMBP1
chr1	142951916	142953048	1133	207.859	0.988685	0.00100381	Intron (uc001eiw.1/uc001eiw.1, intron 1 of 7)	ANKRD20A12P
chr1	143543269	143544640	1372	206.567	0.786806	0.00700364	Distal Intergenic	NA
chr1	144189720	144190931	1212	166.441	0.66473	0.0078075	Promoter (<=1kb)	NBPF20
chr1	144825478	144827805	2328	228.139	1.08191	7.76993e-05	Exon (uc010oxn.2/728841, exon 16 of 19)	NBPF9
chr1	145361264	145362117	854	112.762	0.589525	0.00902232	Promoter (<=1kb)	NBPF10
chr1	146037379	146038149	771	31.9151	1.57267	4.69705e-07	Exon (uc001eox.3/728912, exon 15 of 19)	NA
chr1	148256557	148257546	990	91.6008	0.848297	0.000731086	Promoter (<=1kb)	NBPF14
chr1	148753334	148755260	1927	168.569	0.733823	0.00132853	Exon (uc010pba.1/728936, exon 12 of 16)	NA
chr1	152972576	152973597	1022	82.7357	0.614457	0.00422181	Promoter (<=1kb)	SPRR3
chr1	155903586	155904363	778	47.4678	0.759527	0.00895413	Promoter (<=1kb)	KIAA0907
chr1	178615369	178616247	879	54.9254	-0.717403	0.00278535	Distal Intergenic	MIR4424
chr1	200508891	200510250	1360	184.553	-0.480882	0.00616014	Distal Intergenic	KIF14
chr1	219252437	219253375	939	64.4368	0.664556	0.00178999	Distal Intergenic	LYPLAL1-AS1
chr10	13992595	13993752	1158	77.7471	0.636587	0.00184012	Intron (uc001ims.3/55691, intron 23 of 24)	FRMD4A
chr10	42677851	42679554	1704	160.268	0.753567	0.00163371	Distal Intergenic	LOC441666
chr10	57048629	57049774	1146	77.9784	0.56548	0.00510585	Intron (uc001jjv.1/65217, intron 19 of 20)	MTRNR2L5
chr10	64327388	64328331	944	52.2893	0.623956	0.00547746	Intron (uc001jmc.2/22891, intron 4 of 7)	ZNF365
chr10	64488409	64489550	1142	75.9737	-0.582565	0.00678765	Distal Intergenic	ADO
chr10	117292061	117293078	1018	111.066	0.797872	0.0028511	Intron (uc001lcg.3/26033, intron 25 of 28)	ATRNL1
chr10	129226524	129227400	877	64.1579	-0.647363	0.00342264	Intron (uc001ljt.3/1793, intron 47 of 51)	DOCK1
chr11	8241332	8242267	936	52.589	0.537537	0.00988921	Distal Intergenic	LMO1
chr11	18735929	18737315	1387	116.901	-0.576462	0.00325685	Exon (uc001mpa.2/283284, exon 11 of 21)	IGSF22
chr11	26320146	26321717	1572	100.093	0.575245	0.00704791	Intron (uc010rdr.2/63982, intron 1 of 27)	ANO3
chr11	27554705	27556360	1656	95.9216	0.628504	0.00171399	Intron (uc001mrm.3/497258, intron 1 of 7)	BDNF-AS
chr11	48954708	48955958	1251	152.543	1.05602	0.000781574	Distal Intergenic	TRIM49B
chr11	48962449	48964103	1655	158.812	0.849351	0.00810561	Distal Intergenic	TRIM49B
chr11	50739786	50740608	823	93.5658	0.943899	0.00779423	Distal Intergenic	LOC646813
chr11	50745006	50746158	1153	138.187	1.69094	0.00185959	Distal Intergenic	LOC646813
chr11	80038983	80039902	920	62.7117	0.632928	0.0035053	Distal Intergenic	TENM4
chr11	113804688	113805561	874	50.1367	0.756128	0.00129552	Intron (uc001pok.3/9177, intron 6 of 8)	HTR3B
chr11	115761192	115762357	1166	82.4894	0.601088	0.00166427	Distal Intergenic	LINC00900
chr11	121781080	121782168	1089	71.0687	0.737881	0.00578588	Distal Intergenic	MIR125B1
chr11	128800201	128801311	1111	91.2018	-0.83311	0.0022181	Distal Intergenic	TP53AIP1
chr11	129629669	129630774	1106	75.8116	0.60136	0.00661451	Distal Intergenic	TMEM45B
chr11	133961984	133964465	2482	185.37	0.484715	0.00741844	Intron (uc001qhb.3/83700, intron 1 of 8)	JAM3
chr12	7294638	7295993	1356	114.567	-0.660566	0.00105421	Exon (uc001qsr.3/9746, exon 10 of 18)	CLSTN3
chr12	34833383	34835133	1751	197.761	0.891692	0.0055543	Distal Intergenic	ALG10
chr12	34841207	34842501	1295	137.641	0.859864	0.00303645	Distal Intergenic	ALG10
chr12	38114651	38115789	1139	134.903	0.829884	0.00657841	Distal Intergenic	ALG10B
chr12	62296375	62297197	823	60.1766	0.653088	0.00473795	Intron (uc001sqw.3/338811, intron 4 of 4)	FAM19A2
chr12	66859147	66860240	1094	79.0177	0.621162	0.00269163	Promoter (<=1kb)	GRIP1
chr12	96710487	96711548	1062	90.4557	0.8267	0.0010734	Intron (uc001tep.2/5128, intron 14 of 16)	CDK17
chr12	103687654	103688902	1249	107.388	0.467234	0.00841141	Intron (uc001tjs.3/374470, intron 7 of 10)	C12orf42
chr12	104054944	104056213	1270	82.8096	0.536228	0.00891402	Intron (uc001tjw.3/55576, intron 17 of 68)	STAB2
chr12	104591124	104592197	1074	56.4137	0.758835	0.00781537	Distal Intergenic	TXNRD1
chr12	107616713	107617687	975	69.7558	0.740513	0.00122114	Distal Intergenic	BTBD11
chr12	109268680	109269809	1130	69.0525	-0.569074	0.00965498	Intron (uc001tnp.1/1610, intron 1 of 3)	DAO
chr12	113011502	113013124	1623	232.661	-0.630248	0.00383012	Promoter (<=1kb)	RPH3A
chr13	20370105	20371267	1163	105.569	0.808085	0.00348499	Distal Intergenic	PSPC1
chr13	23150837	23152283	1447	153.376	0.686355	0.00476938	Distal Intergenic	BASP1P1
chr13	63620869	63622283	1415	130.642	0.86418	0.000540825	Distal Intergenic	OR7E156P
chr13	63643611	63645786	2176	212.775	0.791022	0.00121166	Distal Intergenic	OR7E156P
chr13	71555021	71556098	1078	66.0288	0.998077	0.000164092	Distal Intergenic	LINC00348
chr13	77848356	77849635	1280	101.176	0.477511	0.00782466	Intron (uc010aev.3/23077, intron 79 of 82)	MYCBP2
chr13	78997840	78998991	1152	64.6307	-3.99357	8.48026e-16	Intron (uc001vks.3/100874222, intron 2 of 2)	POU4F1
chr13	104620260	104621987	1728	105.324	0.726664	0.00167386	Distal Intergenic	MIR548AS
chr13	111685095	111686356	1262	126.152	-0.4804	0.00722891	Distal Intergenic	ARHGEF7
chr14	28416733	28417666	934	59.2686	0.737626	0.0069293	Distal Intergenic	LINC00645
chr14	31158354	31159450	1097	83.2524	0.74544	0.00339701	Intron (uc010amd.2/23256, intron 13 of 17)	SCFD1
chr14	42276639	42278215	1577	225.206	-0.597679	0.000249082	Intron (uc001wvm.3/145581, intron 2 of 5)	LRFN5
chr14	50981645	50983141	1497	111.493	0.528394	0.00356286	Intron (uc001wya.3/11183, intron 30 of 31)	MAP4K5
chr14	63674878	63676514	1637	128.565	0.457927	0.00760182	Intron (uc001xgb.2/57381, intron 1 of 4)	RHOJ
chr14	102876570	102878191	1622	109.147	0.632278	0.00388947	Intron (uc010txw.2/9895, intron 4 of 5)	TECPR2
chr15	20025335	20026462	1128	121.57	1.06418	0.000564963	Distal Intergenic	CHEK2P2
chr15	20144073	20146428	2356	238.646	0.664694	0.00108998	Distal Intergenic	CHEK2P2
chr15	22323187	22325101	1915	244.606	-0.668079	0.00139911	Intron (uc001ytz.1/727924, intron 4 of 6)	LOC727924
chr15	30918213	30919386	1174	78.7112	0.630947	0.000911508	Promoter (<=1kb)	ARHGAP11B
chr15	35531694	35533064	1371	96.7403	-0.956596	0.0017723	Promoter (2-3kb)	ANP32AP1
chr15	73364968	73366158	1191	92.7999	0.659446	0.00202846	Intron (uc002avm.4/4756, intron 1 of 28)	NEO1
chr15	76481063	76482304	1242	96.7065	-0.559224	0.00861872	Promoter (1-2kb)	C15orf27
chr15	93312245	93313076	832	46.243	0.774975	0.00588579	Distal Intergenic	ASB9P1
chr15	102493765	102494961	1197	100.559	0.991162	0.000377265	Promoter (<=1kb)	FAM138E
chr16	1074906	1075995	1090	148.869	1.08024	0.00150294	Distal Intergenic	SOX8
chr16	2836551	2837773	1223	96.7556	-0.669672	0.00268032	Promoter (<=1kb)	PRSS33
chr16	7016146	7017565	1420	99.2429	0.535041	0.00797571	Intron (uc002cyr.1/54715, intron 3 of 11)	RBFOX1
chr16	16744220	16745066	847	70.144	-0.719136	0.00125676	Distal Intergenic	PKD1P1
chr16	20497761	20499068	1308	105.155	-0.544245	0.00910062	3' UTR	ACSM2A
chr16	29530898	29532404	1507	99.6434	0.773764	0.00562073	Intron (uc002dsp.3/440354, intron 3 of 13)	SMG1P2
chr16	32093731	32095455	1725	205.669	0.76632	0.00768235	Distal Intergenic	NA
chr16	33820403	33821284	882	72.7734	0.706952	0.00394325	Distal Intergenic	LINC00273
chr16	33846807	33847504	698	79.3808	0.97183	0.000654886	Distal Intergenic	LINC00273
chr16	33918092	33919940	1849	254.897	0.975922	0.0010762	Distal Intergenic	LINC00273
chr16	34021465	34023109	1645	146.513	0.944808	0.00430375	Distal Intergenic	LINC00273
chr16	35232097	35233162	1066	159.794	1.27362	0.00798267	Distal Intergenic	FLJ26245
chr16	35274578	35276085	1508	149.856	0.871318	0.00953374	Distal Intergenic	FLJ26245
chr16	46479610	46480651	1042	153.66	0.978893	0.000246135	Distal Intergenic	ANKRD26P1
chr16	68592537	68593397	861	53.3033	0.597509	0.00827445	Intron (uc002ewb.3/146198, intron 5 of 5)	ZFP90
chr16	87672756	87673677	922	54.8028	0.676786	0.00210297	Intron (uc010vou.2/57338, intron 1 of 5)	JPH3
chr17	105669	107523	1855	108.769	-0.905953	0.00195795	Intron (uc010vpy.2/9501, intron 3 of 6)	RPH3AL
chr17	137787	138968	1182	130.736	1.18059	0.000274738	Intron (uc010vpy.2/9501, intron 4 of 6)	RPH3AL
chr17	19133251	19133938	688	51.3535	0.999919	0.00125873	Distal Intergenic	EPN2
chr17	37748983	37750252	1270	79.3043	-0.804516	0.0049085	Distal Intergenic	NEUROD2
chr17	45864886	45865962	1077	92.0297	-0.503667	0.00882257	Distal Intergenic	OSBPL7
chr18	15201337	15202709	1373	122.492	0.559498	0.00448163	Distal Intergenic	LOC644669
chr18	46431009	46432204	1196	144.435	-0.53817	0.00344947	Distal Intergenic	SMAD7
chr18	50838870	50839996	1127	88.7542	-0.584498	0.00786672	Intron (uc002lfe.2/1630, intron 13 of 28)	DCC
chr18	55842949	55844045	1097	81.9255	-0.618783	0.0039853	Intron (uc002lgx.3/23327, intron 2 of 29)	NEDD4L
chr18	62477979	62478980	1002	56.0098	0.845371	0.0019503	Distal Intergenic	LINC01538
chr18	77317243	77318617	1375	256.056	-0.52918	0.00337442	Distal Intergenic	NFATC1
chr19	60552	61279	728	54.9132	0.673529	0.00979061	Exon (uc010drk.1/375690, exon 3 of 3)	WASH5P
chr19	95571	97705	2135	248.547	0.642765	0.00275716	Distal Intergenic	OR4F17
chr19	139888	141384	1497	104.793	0.906377	0.000175394	Distal Intergenic	OR4F17
chr19	1164149	1165272	1124	74.3949	-0.575494	0.00519624	Intron (uc002lrk.4/22904, intron 31 of 31)	SBNO2
chr19	4011228	4012595	1368	163.391	-0.786718	0.000428648	Intron (uc002lzg.3/51588, intron 1 of 10)	PIAS4
chr19	8416520	8417704	1185	126.696	-0.529155	0.0024612	Distal Intergenic	KANK3
chr19	18578162	18579411	1250	128.022	-0.526029	0.00843432	Intron (uc002njg.3/8178, intron 10 of 11)	ELL
chr19	19995652	19996522	871	44.3929	0.829435	0.00118034	Intron (uc002noj.3/56242, intron 3 of 3)	ZNF93
chr19	24601100	24602595	1496	189.66	1.04227	0.000600278	Distal Intergenic	HAVCR1P1
chr19	24613693	24615229	1537	234.293	0.990118	0.00226254	Distal Intergenic	HAVCR1P1
chr19	27805634	27806430	797	80.604	1.20608	0.000717629	Distal Intergenic	LINC00662
chr19	37760097	37762452	2356	182.664	1.44705	1.49174e-08	Promoter (<=1kb)	LOC284412
chr19	37771420	37773467	2048	263.625	1.55566	1.13571e-07	Distal Intergenic	LOC284412
chr19	40754106	40755460	1355	239.394	-0.72364	0.000921694	Intron (uc010egs.3/208, intron 9 of 11)	AKT2
chr19	48412827	48414479	1653	161.192	0.672589	0.00633091	Promoter (1-2kb)	SNAR-C2
chr19	48428979	48430879	1901	182.328	0.781188	0.00341329	Promoter (1-2kb)	SNAR-C2
chr2	2909978	2911287	1310	84.6584	-0.831924	0.00285101	Intron (uc002qxh.1/uc002qxh.1, intron 2 of 6)	TSSC1
chr2	3772476	3773653	1178	98.6345	0.754471	0.00341265	Distal Intergenic	ALLC
chr2	18053062	18053893	832	40.9729	0.778458	0.00875657	Distal Intergenic	KCNS3
chr2	22727127	22728051	925	62.7886	0.727257	0.00192143	Distal Intergenic	LOC645949
chr2	30981112	30982620	1509	207.337	-0.586009	0.00866421	Intron (uc021vfm.1/92291, intron 15 of 21)	CAPN13
chr2	47688614	47689626	1013	60.0931	0.697512	0.00342603	Intron (uc002rvy.2/4436, intron 8 of 15)	MSH2
chr2	75334232	75335172	941	63.1442	0.619089	0.00296571	Intron (uc002sng.2/6869, intron 3 of 4)	MIR5000
chr2	87623223	87624681	1459	220.04	0.766879	0.0044129	Intron (uc002srs.4/64795, intron 3 of 10)	LINC00152
chr2	87644071	87645065	995	101.609	0.923618	0.000484739	Intron (uc002srs.4/64795, intron 3 of 10)	LINC00152
chr2	87655384	87656800	1417	124.814	0.914421	0.000683595	Intron (uc002srs.4/64795, intron 3 of 10)	LINC00152
chr2	91972909	91974320	1412	193.35	0.853181	0.00362656	Downstream (2-3kb)	GGT8P
chr2	97832841	97834035	1195	112.591	1.03243	0.000396328	Exon (uc010fic.2/375248, exon 17 of 28)	ANKRD36
chr2	112079730	112080819	1090	90.4209	0.520221	0.00828857	Promoter (1-2kb)	MIR4435-1
chr2	126939384	126940396	1013	90.2063	0.845457	0.00524005	Distal Intergenic	GYPC
chr2	182616087	182617029	943	68.0234	0.697085	0.00148268	Distal Intergenic	CERKL
chr2	182983066	182983997	932	68.3875	0.687062	0.000725544	Intron (uc002uop.2/151242, intron 5 of 5)	PDE1A
chr2	211422290	211423159	870	53.8038	0.559905	0.00894936	Promoter (<=1kb)	CPS1
chr2	232337124	232338268	1145	138.743	-0.53216	0.00843488	Distal Intergenic	NCL
chr20	970572	971688	1117	62.6986	-0.956302	7.11936e-05	Intron (uc002wej.3/343637, intron 4 of 4)	RSPO4
chr20	13790087	13792431	2345	162.977	0.503345	0.00477788	Intron (uc002wom.3/79133, intron 8 of 10)	NDUFAF5
chr20	25826220	25827489	1270	93.6363	0.658673	0.00151813	Exon (uc031rsn.1/uc031rsn.1, exon 3 of 3)	FAM182B
chr20	26317412	26319135	1724	237.136	1.03364	0.00106738	Distal Intergenic	MIR663AHG
chr20	37873660	37874857	1198	79.6242	0.55173	0.00486714	Distal Intergenic	LOC339568
chr20	40188016	40188966	951	71.6757	0.535213	0.0098614	Intron (uc002xka.1/84181, intron 36 of 36)	CHD6
chr20	54438858	54440151	1294	158.091	0.963465	0.00340468	Distal Intergenic	CBLN4
chr20	55460753	55461681	929	50.2272	-0.654048	0.0079339	Distal Intergenic	TFAP2C
chr20	61083860	61085819	1960	123.674	-0.671731	0.0096972	Distal Intergenic	GATA5
chr20	62756365	62758427	2063	145.793	0.528309	0.00478466	Distal Intergenic	NPBWR2
chr21	9645796	9646917	1122	114.44	0.900659	0.00138828	Distal Intergenic	MIR3648-1
chr21	26360861	26362016	1156	102.485	0.606591	0.00670425	Intron (uc031rvb.1/339622, intron 2 of 3)	LOC339622
chr21	42845694	42847848	2155	102.233	-0.559803	0.00973892	Intron (uc010gor.3/7113, intron 6 of 13)	TMPRSS2
chr22	16863178	16866441	3264	247.631	0.607204	0.00486144	Distal Intergenic	CCT8L2
chr22	17351489	17353170	1682	174.33	0.716655	0.00142912	Distal Intergenic	HSFY1P1
chr22	43781852	43783003	1152	84.6871	-0.528101	0.00795277	Distal Intergenic	MPPED1
chr3	34420472	34421507	1036	68.4504	0.597113	0.00438511	Distal Intergenic	PDCD6IP
chr3	36907041	36908065	1025	64.8938	0.763049	0.003245	Intron (uc003cgj.3/9881, intron 15 of 22)	TRANK1
chr3	39823690	39824699	1010	75.1048	0.642448	0.00508609	Distal Intergenic	MYRIP
chr3	75695128	75696298	1171	113.941	0.885848	0.00284603	Distal Intergenic	MIR1324
chr3	75717921	75718964	1044	156.926	0.960003	0.0031153	Promoter (2-3kb)	LINC00960
chr3	75736662	75738283	1622	215.167	0.983934	0.00190726	Distal Intergenic	LINC00960
chr3	75997720	75998844	1125	124.948	0.945604	0.000267334	Intron (uc021xat.1/6092, intron 1 of 25)	ROBO2
chr3	87597139	87598832	1694	84.6668	0.625357	0.00710723	Distal Intergenic	POU1F1
chr3	90456891	90457955	1065	96.812	1.1442	0.0002393	Distal Intergenic	EPHA3
chr3	103600923	103602126	1204	80.6122	0.656427	0.00833449	Distal Intergenic	MIR548A3
chr3	117299219	117300451	1233	94.7051	0.589446	0.00364402	Distal Intergenic	TUSC7
chr3	131152670	131153689	1020	71.9542	0.742342	0.00290369	Distal Intergenic	SNORA58
chr3	140465455	140466915	1461	104.037	0.536653	0.00353534	Distal Intergenic	TRIM42
chr3	189128061	189129343	1283	156.776	-0.412926	0.00737919	Distal Intergenic	TPRG1-AS2
chr3	196675320	196676375	1056	51.936	-0.859264	0.00336442	Exon (uc003fxh.3/80235, exon 3 of 3)	NCBP2-AS2
chr4	1384346	1385463	1118	92.7476	0.681425	0.00698653	Promoter (<=1kb)	CRIPAK
chr4	5641311	5642672	1362	186.561	-0.615912	0.00150488	5' UTR	EVC2
chr4	8610254	8611529	1276	129.081	-0.700189	0.000112075	Intron (uc003gll.3/8532, intron 8 of 12)	CPZ
chr4	8996068	8997360	1293	81.8946	0.670652	0.00211438	Distal Intergenic	LOC650293
chr4	9260675	9261972	1298	178.433	0.807196	0.0033886	Promoter (<=1kb)	USP17L11
chr4	9369599	9371101	1503	152.956	0.895148	0.000556124	Promoter (<=1kb)	USP17L6P
chr4	22419538	22420612	1075	75.5898	0.672508	0.00444894	Intron (uc010ieo.2/166647, intron 7 of 16)	ADGRA3
chr4	24496542	24497791	1250	160.173	-0.608558	0.00691618	Distal Intergenic	PPARGC1A
chr4	49336985	49338939	1955	264.04	0.417914	0.00268964	Distal Intergenic	CWH43
chr4	53102469	53103732	1264	80.257	0.624272	0.00234522	Distal Intergenic	SPATA18
chr4	88269028	88270573	1546	170.65	0.803127	0.00547527	Intron (uc003hqp.2/51170, intron 2 of 6)	HSD17B13
chr4	90276947	90278448	1502	100.245	-0.753689	0.000345117	Distal Intergenic	GPRIN3
chr4	93951671	93952394	724	42.4955	0.68836	0.00641756	Intron (uc010ikx.3/2895, intron 2 of 5)	GRID2
chr4	103629736	103631110	1375	153.561	-0.466396	0.00677653	Intron (uc003hwg.3/4126, intron 12 of 16)	MANBA
chr4	124939125	124940288	1164	106.866	-0.755956	0.00147848	Distal Intergenic	LINC01091
chr4	162434037	162435036	1000	61.1269	0.86868	0.00146653	Intron (uc003iqh.4/56884, intron 6 of 15)	FSTL5
chr4	176563319	176564785	1467	95.7479	0.608783	0.00456305	Intron (uc011ckj.2/2823, intron 3 of 6)	GPM6A
chr4	179006989	179007781	793	64.4646	0.591748	0.00679964	Distal Intergenic	LINC01098
chr4	185597134	185598068	935	77.8105	-0.669131	0.00822509	Intron (uc010isd.1/201973, intron 6 of 6)	PRIMPOL
chr5	1097691	1099308	1618	138.681	-0.492337	0.00748107	Intron (uc003jbu.3/10723, intron 23 of 23)	SLC12A7
chr5	2525517	2526676	1160	88.0417	0.685437	0.00647024	Distal Intergenic	IRX2
chr5	17598486	17599967	1482	227.3	0.92305	0.00239916	Distal Intergenic	LOC401177
chr5	34149883	34151018	1136	126.832	0.764529	0.00652228	Distal Intergenic	C1QTNF3
chr5	46323965	46324527	563	64.6208	1.13112	0.000649722	Distal Intergenic	HCN1
chr5	49405519	49406687	1169	226	0.947267	0.00263079	Distal Intergenic	EMB
chr5	49545286	49546210	925	86.3712	1.07134	0.000364552	Distal Intergenic	EMB
chr5	52490384	52491412	1029	60.4654	0.64649	0.00179562	Distal Intergenic	LOC257396
chr5	83834869	83835791	923	59.2915	0.665921	0.00572324	Distal Intergenic	EDIL3
chr5	97046597	97047670	1074	82.7184	0.595074	0.00283856	Distal Intergenic	RIOK2
chr5	141995830	141996721	892	63.4842	0.531514	0.0095831	Promoter (2-3kb)	FGF1
chr5	165645603	165646509	907	54.6116	0.655724	0.00756593	Distal Intergenic	TENM2
chr5	177232426	177234582	2157	261.084	-0.67335	0.00770368	Distal Intergenic	FAM153A
chr6	601794	602742	949	57.0991	0.942623	0.00413206	Intron (uc003mtd.4/55770, intron 21 of 27)	HUS1B
chr6	38674796	38675933	1138	101.607	0.790536	0.00946972	Distal Intergenic	GLO1
chr6	48344732	48346295	1564	95.7149	0.634198	0.00337516	Distal Intergenic	PTCHD4
chr6	57593339	57595319	1981	205.825	0.52337	0.00381065	Distal Intergenic	PRIM2
chr6	83274022	83275356	1335	177.006	0.782418	0.00739961	Distal Intergenic	TPBG
chr6	85739558	85740777	1220	79.5985	0.703825	0.00185459	Distal Intergenic	TBX18
chr6	87685328	87686281	954	55.5502	0.625324	0.0099102	Intron (uc003pli.3/3354, intron 1 of 1)	HTR1E
chr6	136051968	136052944	977	78.3128	0.620337	0.00307361	Distal Intergenic	PDE7B
chr6	138130821	138132298	1478	117.551	0.484481	0.00604643	Distal Intergenic	TNFAIP3
chr6	150471512	150472484	973	64.7614	0.582432	0.0058626	Intron (uc003qnt.3/81706, intron 1 of 3)	PPP1R14C
chr6	170967510	170970139	2630	218.753	0.77728	0.000216077	Distal Intergenic	PDCD2
chr7	10661918	10663019	1102	87.0802	0.586904	0.00858783	Distal Intergenic	NDUFA4
chr7	29216817	29218093	1277	101.198	0.579404	0.00263879	Intron (uc011jzs.2/1124, intron 2 of 13)	CHN2
chr7	38392169	38393158	990	53.2321	-1.69167	1.49435e-05	Intron (uc003tgp.2/100506776, intron 3 of 3)	TRG-AS1
chr7	44987158	44988585	1428	103.298	0.625241	0.00948932	Distal Intergenic	MYO1G
chr7	53222891	53224101	1211	163.347	0.72816	0.00657425	Distal Intergenic	POM121L12
chr7	57947121	57948205	1085	140.904	0.868143	0.00142153	Distal Intergenic	ZNF716
chr7	57965005	57966036	1032	122.909	1.60588	0.00916213	Distal Intergenic	ZNF716
chr7	57996433	57997888	1456	225.077	0.961564	0.00314272	Distal Intergenic	ZNF716
chr7	61191471	61192133	663	47.5832	1.16124	0.00318223	Distal Intergenic	ZNF733P
chr7	62028434	62030267	1834	178.149	0.90234	0.00113049	Distal Intergenic	ZNF733P
chr7	63028030	63029071	1042	105.768	0.649704	0.00925448	Distal Intergenic	MIR4283-1
chr7	64960212	64961754	1543	169.611	0.916212	0.000788802	Distal Intergenic	ZNF92
chr7	65040969	65042779	1811	133.437	0.889029	0.000947851	Distal Intergenic	INTS4P2
chr7	65054398	65055366	969	98.6899	0.756719	0.00841218	Distal Intergenic	INTS4P2
chr7	80069661	80070944	1284	89.7466	0.592881	0.00177946	Intron (uc003uhc.3/948, intron 1 of 16)	GNAT3
chr7	120217626	120218593	968	58.9393	0.608564	0.00633444	Intron (uc003vjj.1/3751, intron 1 of 5)	TSPAN12
chr7	131378446	131379349	904	55.5082	0.658915	0.00355737	Distal Intergenic	PODXL
chr7	158441231	158441917	687	45.1927	1.23804	3.29761e-05	Intron (uc011kwc.1/54892, intron 4 of 14)	NCAPG2
chr8	36713	37965	1253	76.8293	-0.931473	0.00312722	Distal Intergenic	OR4F21
chr8	96097	98127	2031	157.166	1.03169	1.09732e-05	Distal Intergenic	OR4F21
chr8	756728	758105	1378	191.356	-0.544893	0.000666801	Intron (uc003wpj.2/619343, intron 1 of 3)	ERICH1-AS1
chr8	2271204	2273053	1850	174.414	0.499214	0.00514766	Distal Intergenic	MYOM2
chr8	9595386	9596286	901	57.2935	0.849572	0.00178031	Promoter (2-3kb)	MIR597
chr8	15215720	15216796	1077	55.0765	-0.823743	0.00177007	Distal Intergenic	SGCZ
chr8	18959245	18960622	1378	109.017	-0.612107	0.00159259	Distal Intergenic	PSD3
chr8	38500533	38501556	1024	66.7251	0.601865	0.00326881	Distal Intergenic	RNF5P1
chr8	57451627	57453179	1553	268.14	-0.439206	0.00790773	Intron (uc003xtb.1/uc003xtb.1, intron 2 of 3)	LINC00968
chr8	111967466	111968685	1220	177.178	0.894501	0.000557686	Distal Intergenic	KCNV1
chr8	114609476	114610358	883	52.4967	0.754778	0.00483269	Distal Intergenic	CSMD3
chr8	142824240	142825348	1109	60.1158	-1.06749	0.00161637	Distal Intergenic	MROH5
chr9	12706	14496	1791	132.576	1.03884	0.000414136	Promoter (<=1kb)	DDX11L5
chr9	20893	22272	1380	134.503	0.792778	0.000182208	Promoter (1-2kb)	WASH1
chr9	17489762	17490809	1048	54.4388	0.737295	0.00810935	Intron (uc003zmy.3/54875, intron 25 of 25)	SH3GL2
chr9	38814525	38815400	876	30.0626	1.23441	0.000946033	Distal Intergenic	FAM201A
chr9	45350327	45351845	1519	134.205	0.799481	0.00917051	Distal Intergenic	FAM27C
chr9	66846098	66847469	1372	212.879	0.95993	0.00201092	Distal Intergenic	LOC286297
chr9	66978098	66979269	1172	175.395	1.01922	0.00141049	Distal Intergenic	LOC286297
chr9	68729721	68731051	1331	141.749	0.786036	0.00332056	Intron (uc022bhu.1/100132352, intron 3 of 5)	FRG1HP
chr9	69702986	69704243	1258	169.242	0.994415	0.00386398	Distal Intergenic	LOC100133920
chr9	70006021	70007003	983	72.7174	1.04525	0.00330763	Distal Intergenic	FOXD4L5
chr9	70668025	70669265	1241	80.2562	0.677397	0.00867747	Distal Intergenic	CBWD3
chr9	90033120	90034292	1173	151.841	-0.504595	0.00389863	Distal Intergenic	DAPK1
chr9	126668907	126670321	1415	211.438	0.804552	0.00612476	Intron (uc004bnz.1/57706, intron 21 of 21)	DENND1A
chr9	127656809	127658564	1756	141.521	0.501962	0.00450773	Intron (uc010mws.3/2800, intron 8 of 17)	ARPC5L
chr9	138503176	138504569	1394	134.345	-0.530402	0.00143066	Distal Intergenic	GLT6D1
chrX	685196	686419	1224	142.516	0.727238	0.0011614	Distal Intergenic	SHOX
chrX	690652	692298	1647	230.322	0.722415	0.00660934	Distal Intergenic	SHOX
chrX	5726346	5727663	1318	161.89	-0.862064	0.001364	Distal Intergenic	NLGN4X
chrX	7122076	7123437	1362	173.538	-0.649115	0.00716681	Intron (uc004crw.2/412, intron 2 of 2)	STS
chrX	48853404	48854927	1524	167.267	-0.731315	0.00842261	Exon (uc004dly.1/56850, exon 4 of 26)	GRIPAP1
chrX	50087673	50089030	1358	111.469	-0.71963	0.00674609	Promoter (2-3kb)	CCNB3
chrX	55986510	55987726	1217	69.0129	-0.77087	0.00757641	Distal Intergenic	RRAGB
chrX	61823004	61823999	996	108.353	0.937969	0.00670569	Distal Intergenic	SPIN4
chrX	61866052	61867251	1200	123.826	0.885986	0.00217587	Distal Intergenic	SPIN4
chrX	88954695	88955776	1082	51.3835	-0.784668	0.00914243	Distal Intergenic	TGIF2LX
chrX	91402381	91403604	1224	166.246	-0.695493	0.00673244	Intron (uc004efk.2/27328, intron 2 of 6)	PCDH11X
chrX	142796642	142797645	1004	59.795	-0.919583	0.0037152	Intron (uc004fbz.3/494119, intron 1 of 1)	SPANXN2
chrY	9908566	9909696	1131	195.32	0.864005	0.00661571	Distal Intergenic	TTTY23
chrY	28586984	28588545	1562	142.593	0.901227	0.000778128	Distal Intergenic	TTTY3
