# Supplementary material for: Effect of prematurity on genome wide methylation in the placenta
Source: BMC Med Genet. 2019 Jun 28;20:116. doi: 10.1186/s12881-019-0835-6 (PMC6599230; doi:10.1186/s12881-019-0835-6)
Supplement: Supplementary file 4 — DMRs Associated with Gestational Age. A tab delimitated table containing information for each DMR that was found to be associated to gestational age with p < .01. The columns contain: Chromosome, DMR start location, DMR end location, with of DMR, base expression, log2FoldChange, p value, functional annotation and annotated nearest gene. (XLSX 80 kb) [file 12881_2019_835_MOESM4_ESM.xlsx]

## Sheet: Sheet1
DMRs Associated with Gestational Age
Chromosome	DMR Start	DMR End	Width	baseMean	log2FoldChange	pvalue	Annotation	Nearest Gene
chr11	1069275	1070940	1666	275.32	-0.0778957	2.78693e-07	Distal Intergenic	MUC2
chr7	158509262	158511170	1909	785.42	-0.0551294	2.29605e-06	Distal Intergenic	NCAPG2
chr8	143302533	143305491	2959	708.699	-0.0576669	2.23858e-06	Intron (uc003ywj.3/203062, intron 1 of 12)	LINC00051
chr11	51578781	51581392	2612	5862.83	0.120896	1.90635e-05	Distal Intergenic	OR4C46
chr15	22741829	22744210	2382	1025.05	-0.0915574	1.70955e-05	Exon (uc010tzx.1/283767, exon 8 of 9)	GOLGA6L1
chr17	21901996	21907966	5971	1435.13	0.11459	2.4627e-05	Promoter (<=1kb)	FLJ36000
chr11	51587552	51593541	5990	6613.76	0.114797	4.28873e-05	Distal Intergenic	OR4C46
chr10	115540477	115542108	1632	369.529	-0.058238	5.79214e-05	Promoter (2-3kb)	MIR4483
chr4	9876	10674	799	300.733	-0.0664308	9.52372e-05	Distal Intergenic	ZNF595
chr5	49415137	49417649	2513	629.627	0.0986938	0.000104089	Distal Intergenic	EMB
chr15	56071748	56073363	1616	280.282	-0.0447663	0.000153756	Distal Intergenic	PRTG
chrY	59027086	59033404	6319	757.989	0.0852969	0.00016866	Distal Intergenic	SPRY3
chr10	127579483	127584720	5238	732.282	0.0728484	0.000374947	Promoter (<=1kb)	DHX32
chr10	134878561	134880844	2284	289.137	-0.0806101	0.000326771	Distal Intergenic	ADGRA1
chr11	1795936	1798177	2242	452.753	-0.0590254	0.000246257	Distal Intergenic	MOB2
chr11	51570929	51573041	2113	623.71	0.104723	0.000419231	Distal Intergenic	OR4C46
chr11	51581775	51585209	3435	3634.64	0.0990901	0.000384551	Distal Intergenic	OR4C46
chr19	24622361	24624613	2253	338.039	0.100239	0.000339893	Distal Intergenic	HAVCR1P1
chr2	60693763	60695701	1939	293.887	-0.0743003	0.000369626	Intron (uc002sab.3/53335, intron 2 of 4)	BCL11A
chr2	90374620	90378951	4332	2470.99	0.089041	0.000349875	Intron (uc031rom.1/uc031rom.1, intron 40 of 41)	MIR4436A
chr2	92280420	92282186	1767	1109.5	0.0858456	0.000288049	Distal Intergenic	ACTR3BP2
chr21	11121794	11128301	6508	1510.74	0.0437437	0.000348732	Distal Intergenic	BAGE
chr5	49413370	49415026	1657	555.347	0.102897	0.000302389	Distal Intergenic	EMB
chr6	58775747	58780286	4540	59219.2	0.0889928	0.000339828	Distal Intergenic	GUSBP4
chr6	132921368	132922856	1489	702.859	-0.0771013	0.000252353	Distal Intergenic	TAAR3
chr7	155125414	155128850	3437	1162.76	-0.0387481	0.000406386	Distal Intergenic	INSIG1
chr7	155199141	155201882	2742	355.575	-0.0774941	0.000421466	Distal Intergenic	EN2
chr2	91603907	91606341	2435	1002.44	0.0942596	0.000440665	Distal Intergenic	LOC654342
chr1	16888160	16896002	7843	1691.3	0.0555714	0.000498896	3' UTR	MIR3675
chr2	91595933	91600986	5054	2660.11	0.0858477	0.000525888	Distal Intergenic	LOC654342
chr5	49428378	49432607	4230	1837.6	0.0945299	0.000540354	Distal Intergenic	EMB
chr5	49434813	49441568	6756	3582.6	0.0920334	0.000525498	Distal Intergenic	EMB
chr8	143093457	143095020	1564	434.259	-0.0486252	0.000586236	Distal Intergenic	MIR4472-1
chr9	43157895	43160792	2898	440.631	-0.0515996	0.0006176	Distal Intergenic	LOC642929
chr3	196625150	196626329	1180	5459.85	0.0911278	0.000653619	Intron (uc003fwz.4/205564, intron 2 of 9)	SENP5
chr1	2775173	2776643	1471	300.314	-0.0498695	0.00114375	Distal Intergenic	TTC34
chr1	161411316	161417356	6041	980.018	0.0590542	0.000970899	Exon (uc021pcd.1/uc021pcd.1, exon 1 of 1)	FCGR2A
chr1	227165109	227167121	2013	321.038	-0.0547242	0.000973065	Promoter (<=1kb)	ADCK3
chr10	42639383	42642799	3417	471.938	0.0535919	0.00112401	Distal Intergenic	LOC441666
chr12	117759234	117761187	1954	733.374	-0.0510974	0.00115921	Intron (uc001twm.2/4842, intron 27 of 28)	NOS1
chr12	131743022	131745096	2075	402.173	-0.0424103	0.00094184	Distal Intergenic	LINC01257
chr14	104680717	104682479	1763	393.932	-0.0390365	0.000843186	Distal Intergenic	KIF26A
chr14	106130891	106133431	2541	327.587	-0.0503285	0.000958937	Intron (uc031qqx.1/uc031qqx.1, intron 15 of 4910)	ELK2AP
chr18	9877	11028	1152	869.363	-0.05879	0.000827831	Distal Intergenic	ROCK1P1
chr2	90380983	90382232	1250	703.058	0.0876081	0.00100941	Intron (uc031rom.1/uc031rom.1, intron 40 of 41)	MIR4436A
chr2	90390889	90393740	2852	1224.86	0.0826393	0.00100669	Intron (uc031rom.1/uc031rom.1, intron 40 of 41)	MIR4436A
chr2	232245136	232247014	1879	684.534	-0.049274	0.001138	Distal Intergenic	B3GNT7
chr2	233878889	233880783	1895	458.873	-0.0425337	0.00102795	Promoter (<=1kb)	NGEF
chr21	47233704	47236436	2733	660.011	-0.0458794	0.00105615	Intron (uc010gqb.3/54039, intron 2 of 13)	LOC100129027
chr22	28043664	28045838	2175	319.439	-0.0453821	0.000875877	Distal Intergenic	MN1
chr3	185842548	185844972	2425	338.006	-0.04082	0.000920506	Distal Intergenic	ETV5
chr4	3679283	3681125	1843	632.213	-0.0393946	0.001055	Promoter (<=1kb)	LOC100133461
chr5	171997238	171998674	1437	574.01	-0.0407523	0.00110277	Distal Intergenic	NEURL1B
chr5	172145043	172146642	1600	283.15	-0.0394056	0.00107171	Distal Intergenic	DUSP1
chr7	35083301	35086409	3109	667.035	-0.0639389	0.00107819	Exon (uc003teo.1/uc003teo.1, exon 1 of 1)	DPY19L1
chr8	27426563	27428394	1832	618.559	-0.0464533	0.000772097	Distal Intergenic	CLU
chrX	148615983	148617887	1905	496.835	-0.0711875	0.00106978	Promoter (<=1kb)	IDS
chr14	77322209	77324017	1809	358.473	-0.0368537	0.00118681	Exon (uc001xsx.2/145497, exon 10 of 14)	LRRC74A
chr14	94213176	94214970	1795	274.905	-0.04456	0.00120982	Intron (uc001ybw.1/145270, intron 2 of 4)	PRIMA1
chr8	143824285	143827190	2906	872.611	-0.0563283	0.00122627	Promoter (<=1kb)	SLURP1
chr2	92289473	92292822	3350	4738.84	0.0854561	0.00128329	Distal Intergenic	ACTR3BP2
chr1	15170989	15172589	1601	341.856	-0.0430701	0.00132894	Intron (uc009vog.1/23254, intron 1 of 7)	KAZN
chr1	22873179	22875162	1984	628.925	-0.0481959	0.00135925	Distal Intergenic	EPHA8
chr15	32781661	32783301	1641	391.249	-0.0445704	0.00135179	Distal Intergenic	GOLGA8O
chr2	92294964	92300499	5536	4633.96	0.0856059	0.00146933	Distal Intergenic	ACTR3BP2
chr4	5852907	5854271	1365	315.873	-0.0426892	0.00150675	Exon (uc003giq.3/1400, exon 5 of 14)	CRMP1
chr7	15223274	15225157	1884	555.787	-0.0500354	0.00150004	Distal Intergenic	DGKB
chr7	61738068	61741345	3278	476.714	0.0447636	0.00170984	Distal Intergenic	ZNF733P
chr18	15404550	15410901	6352	972.993	0.132792	0.0017436	Distal Intergenic	LOC644669
chr14	100928619	100930014	1396	318.841	-0.0474512	0.00184074	Intron (uc010avx.3/79446, intron 2 of 6)	WDR25
chr16	27838607	27840145	1539	284.24	-0.0404604	0.00182986	Exon (uc010bxz.1/146395, exon 3 of 6)	KIAA0556
chr2	64602224	64603887	1664	661.094	-0.0534326	0.00180545	Distal Intergenic	LGALSL
chr6	18565039	18567000	1962	730.823	-0.0519939	0.00185436	Intron (uc003nct.1/uc003nct.1, intron 3 of 7)	MIR548A1
chr8	43792849	43795213	2365	1959.95	0.090184	0.00186616	Distal Intergenic	POTEA
chr7	157568335	157570257	1923	865.365	-0.040034	0.00190455	Intron (uc011kwa.2/5799, intron 11 of 22)	LOC100506585
chr10	127939584	127941428	1845	698.433	-0.0330336	0.00206096	Intron (uc001ljk.2/8038, intron 20 of 22)	ADAM12
chr22	43903609	43906380	2772	835.648	-0.0452146	0.00207743	Downstream (<1kb)	EFCAB6-AS1
chr1	202592866	202594880	2015	275.515	-0.0406313	0.00218754	Intron (uc001gye.3/127833, intron 8 of 8)	SYT2
chrY	9930866	9933680	2815	316.15	0.0707923	0.00218335	Distal Intergenic	TTTY23
chr12	128725202	128727395	2194	336.207	-0.0415432	0.00223493	Distal Intergenic	TMEM132C
chr2	90371420	90374495	3076	1492.05	0.0819243	0.00224703	Intron (uc031rom.1/uc031rom.1, intron 40 of 41)	MIR4436A
chr4	7119119	7121126	2008	576.495	-0.03231	0.00231543	Distal Intergenic	FLJ36777
chr1	19251758	19253116	1359	550.359	-0.0335931	0.00253548	Intron (uc001bbd.2/126917, intron 8 of 8)	ALDH4A1
chr1	143538645	143541402	2758	436.261	0.0721186	0.0024939	Distal Intergenic	NA
chr20	6189216	6190717	1502	475.763	-0.0373412	0.00251896	Distal Intergenic	FERMT1
chr7	521455	523563	2109	427.769	-0.0403103	0.00249704	Distal Intergenic	PDGFA
chr16	1357086	1358921	1836	469.903	-0.0435586	0.00267527	Promoter (<=1kb)	UBE2I
chr4	7725458	7727200	1743	452.321	-0.0567715	0.00261832	Exon (uc003gkb.4/57537, exon 19 of 27)	AFAP1-AS1
chr5	173237126	173239017	1892	349.943	-0.0423481	0.00266768	Distal Intergenic	CPEB4
chr7	61802862	61805203	2342	283.308	0.0780249	0.00267596	Distal Intergenic	ZNF733P
chr1	154727403	154729387	1985	315.72	-0.0511974	0.00275737	Intron (uc001ffo.3/3782, intron 5 of 7)	KCNN3
chr10	134987426	134990295	2870	856.361	-0.0411384	0.00281291	Intron (uc001llz.1/85442, intron 3 of 29)	KNDC1
chr14	19027475	19029309	1835	288.297	0.090917	0.00278939	Distal Intergenic	OR11H12
chrX	5815244	5816904	1661	294.115	-0.0678133	0.00277457	Intron (uc004crp.3/57502, intron 1 of 5)	NLGN4X
chr20	61026146	61027805	1660	393.237	-0.0608675	0.00288644	Distal Intergenic	GATA5
chr2	91612382	91616166	3785	1387.45	0.074636	0.00294696	Distal Intergenic	LOC654342
chr2	92304910	92314450	9541	25091.3	0.0857127	0.00293272	Distal Intergenic	ACTR3BP2
chr5	2160095	2161690	1596	310.761	-0.0509907	0.00299792	Distal Intergenic	IRX4
chr2	102608020	102609603	1584	372.716	-0.0411445	0.00309261	Promoter (<=1kb)	IL1R2
chr22	37467182	37469751	2570	869.068	-0.0367273	0.00306276	Exon (uc003aqs.1/164656, exon 13 of 18)	KCTD17
chr9	96580011	96581411	1401	389.182	-0.0492613	0.00308488	Promoter (<=1kb)	MIR4291
chr12	117174651	117176042	1392	351.455	-0.0447196	0.0032425	Promoter (<=1kb)	C12orf49
chr3	13655422	13656957	1536	318.706	-0.0407735	0.00325931	Exon (uc011auz.2/2199, exon 5 of 17)	LINC00620
chr7	33753573	33755211	1639	471.832	-0.0423129	0.00330036	Distal Intergenic	BMPER
chr5	49409519	49410620	1102	392.214	0.0789873	0.00335617	Distal Intergenic	EMB
chr13	114752962	114755714	2753	1034.78	-0.0393567	0.00351545	Intron (uc010tkk.2/22821, intron 2 of 23)	RASA3
chr7	151537948	151540319	2372	671.288	-0.0362201	0.00345589	Intron (uc003wkk.3/51422, intron 15 of 15)	PRKAG2
chr7	157557068	157559669	2602	1183.72	-0.039299	0.00351172	Intron (uc011kwa.2/5799, intron 11 of 22)	LOC100506585
chr9	138032538	138034141	1604	302.347	-0.0431378	0.00355127	Distal Intergenic	OLFM1
chr2	96615507	96618616	3110	319.922	0.0719324	0.00361044	Exon (uc010yug.1/uc010yug.1, exon 15 of 27)	FAHD2CP
chr2	90477658	90483367	5710	817.576	0.0688331	0.00369343	Distal Intergenic	LOC654342
chr1	201224497	201228143	3647	1535.97	-0.0429879	0.00373187	Distal Intergenic	PKP1
chr16	8611195	8615641	4447	1344.49	-0.0386921	0.003907	Distal Intergenic	TMEM114
chr4	7544618	7546399	1782	318.902	-0.0472004	0.00393274	Intron (uc003gkb.4/57537, intron 3 of 26)	MIR4274
chr2	133004904	133009968	5065	662.441	0.0735334	0.0040128	Intron (uc002ttj.3/554226, intron 4 of 4)	MIR663B
chr9	73946029	73947394	1366	290.204	-0.0480399	0.00415331	Intron (uc004aii.3/80036, intron 5 of 5)	TRPM3
chr2	132797937	132800593	2657	355.489	0.0434728	0.00419542	Distal Intergenic	ANKRD30BL
chr2	4517209	4518630	1422	327.287	-0.0429047	0.00432587	Distal Intergenic	LINC01249
chr2	131964952	131967057	2106	410.748	-0.0395188	0.00434277	Intron (uc002tsh.2/55041, intron 6 of 6)	POTEE
chr20	49973778	49975389	1612	350.678	-0.0377749	0.00431982	Distal Intergenic	MIR3194
chr14	106148943	106152130	3188	444.119	-0.0450204	0.00445133	Intron (uc031qqx.1/uc031qqx.1, intron 19 of 4910)	ELK2AP
chr16	87771690	87773669	1980	518.364	-0.0494785	0.00451544	Intron (uc010cht.2/54758, intron 6 of 8)	KLHDC4
chr12	124950994	124954064	3071	763.459	-0.038576	0.00460018	Intron (uc010tbb.2/9612, intron 43 of 48)	NCOR2
chr7	61082907	61084759	1853	318.044	0.0722853	0.00464601	Distal Intergenic	ZNF733P
chr16	88276843	88278811	1969	284.531	-0.0466882	0.00474966	Distal Intergenic	ZNF469
chr21	9826579	9834735	8157	2065.52	0.0530679	0.00480254	Promoter (<=1kb)	MIR3687-1
chr16	88583314	88587361	4048	1220.1	-0.0394144	0.00495663	Intron (uc002fkv.3/161882, intron 4 of 9)	MIR5189
chrY	10041892	10044852	2961	532.802	0.0774143	0.00498418	Distal Intergenic	TTTY23
chr20	24411068	24413365	2298	289.708	-0.0382026	0.0050398	Distal Intergenic	SYNDIG1
chr10	132587892	132590420	2529	522.934	-0.0390982	0.00517062	Distal Intergenic	MIR378C
chr17	71495721	71497574	1854	829.687	-0.03435	0.00529506	Intron (uc010dfm.3/54549, intron 43 of 44)	SDK2
chr2	241671206	241672906	1701	322.538	-0.0569533	0.00532927	Intron (uc031rsb.1/547, intron 11 of 45)	KIF1A
chr21	9472705	9474557	1853	886.683	-0.0408258	0.00517791	Distal Intergenic	MIR3648-1
chr5	180899896	180903257	3362	290.831	0.0592831	0.00528678	Distal Intergenic	OR4F16
chr8	144247411	144251085	3675	1330.22	-0.042835	0.00532055	Distal Intergenic	LY6H
chr9	91344695	91346646	1952	576.896	-0.0423925	0.00519562	Distal Intergenic	MIR4289
chr9	95972818	95974772	1955	426.045	-0.0304888	0.00537835	Intron (uc010mrc.1/65268, intron 1 of 9)	WNK2
chrY	13472965	13475348	2384	562.76	0.0824971	0.00535919	Distal Intergenic	GYG2P1
chr21	11148067	11153388	5322	1219.69	0.0655137	0.00551511	Distal Intergenic	BAGE
chr1	2967446	2969297	1852	324.041	-0.0498887	0.00586806	Distal Intergenic	LINC00982
chr1	26093590	26096415	2826	571.416	-0.0443145	0.00597167	Intron (uc001bkm.2/57134, intron 7 of 11)	SEPN1
chr11	1913382	1915827	2446	691.84	-0.0426181	0.00603611	3' UTR	LSP1
chr13	114777324	114780177	2854	679.743	-0.0350795	0.00602876	Exon (uc010tkk.2/22821, exon 15 of 24)	RASA3
chr21	11113690	11121569	7880	1739.37	0.0429459	0.00584376	Distal Intergenic	BAGE
chrY	13481575	13487232	5658	1869.98	0.0744612	0.00591997	Distal Intergenic	GYG2P1
chr5	1165537	1167307	1771	374.923	-0.038086	0.00609298	Distal Intergenic	SLC6A19
chr3	133132375	133137550	5176	2077.37	-0.0401878	0.00613962	Intron (uc003epn.1/8419, intron 1 of 6)	BFSP2
chr20	59984819	59986673	1855	370.657	-0.0377887	0.00625597	Intron (uc002ybn.2/1002, intron 2 of 15)	CDH4
chr7	144968085	144969429	1345	296.16	-0.040659	0.00622	Distal Intergenic	TPK1
chr1	31263611	31265117	1507	437.659	-0.043652	0.0065227	Distal Intergenic	LAPTM5
chr20	20276154	20277702	1549	509.398	-0.050929	0.00651576	Intron (uc002wru.3/26074, intron 24 of 26)	CFAP61
chr5	425890	427694	1805	476.062	-0.0467515	0.00655323	Intron (uc003jav.3/57491, intron 7 of 11)	AHRR
chr12	132172246	132174449	2204	422.461	-0.0388815	0.00667412	Distal Intergenic	SFSWAP
chr6	54174679	54176289	1611	342.31	-0.0452739	0.00664194	Promoter (1-2kb)	TINAG
chr10	133183124	133185666	2543	1134.34	-0.0404605	0.00675895	Distal Intergenic	TCERG1L
chr20	22814836	22816370	1535	333.371	-0.0516882	0.00681066	Distal Intergenic	SSTR4
chr1	26076959	26078347	1389	316.31	-0.0400893	0.00697805	Intron (uc001bkm.2/57134, intron 4 of 11)	SEPN1
chr10	42657688	42663025	5338	706.605	0.0583321	0.00692332	Distal Intergenic	LOC441666
chr13	112849426	112851131	1706	460.05	-0.0410111	0.00713213	Distal Intergenic	SOX1
chr6	153132414	153133824	1411	381.996	-0.0328568	0.00717266	Distal Intergenic	VIP
chr8	22664843	22666372	1530	337.183	-0.0332196	0.00704084	Intron (uc003xcn.1/157310, intron 3 of 6)	EGR3
chr8	27122510	27124115	1606	484.139	-0.049668	0.0071513	Distal Intergenic	STMN4
chr9	133329464	133331389	1926	456.508	-0.0316845	0.00711277	Exon (uc004bzm.3/445, exon 4 of 16)	ASS1
chrY	9943269	9946476	3208	377.936	0.0639888	0.00694643	Distal Intergenic	TTTY23
chr19	17095552	17097128	1577	405.664	-0.0383569	0.00724186	Intron (uc002nfb.3/27151, intron 29 of 41)	CPAMD8
chr1	16932178	16936537	4360	710.057	0.0370826	0.00754457	5' UTR	NBPF1
chr11	2145360	2148971	3612	1071.57	-0.0385804	0.00760298	Distal Intergenic	INS-IGF2
chr11	59065617	59067211	1595	309.822	-0.0380887	0.00755585	Distal Intergenic	OR5AN1
chr19	31306266	31308010	1745	705.873	-0.0451979	0.00756945	Distal Intergenic	NA
chr20	26199504	26205575	6072	955.752	0.0584999	0.00744914	Distal Intergenic	MIR663AHG
chr21	10151671	10155320	3650	476.848	0.0604522	0.00743268	Distal Intergenic	TEKT4P2
chr9	138643937	138645475	1539	380.309	-0.0382296	0.00752545	Promoter (<=1kb)	KCNT1
chr1	149031401	149035972	4572	724.771	0.0669999	0.00773899	Distal Intergenic	LOC645166
chr16	33981331	33985622	4292	970.397	0.0746983	0.00771366	Distal Intergenic	LINC00273
chr9	68393284	68394653	1370	276.528	0.0658591	0.00772853	Distal Intergenic	FRG1JP
chr9	136798082	136799750	1669	444.976	-0.0363969	0.00783364	Intron (uc004cer.3/7410, intron 25 of 26)	VAV2
chr16	57738806	57741379	2574	946.506	-0.0375358	0.00807522	Exon (uc002emi.3/84229, exon 6 of 18)	DRC7
chr19	15922618	15925197	2580	575.398	-0.0474543	0.0080165	Distal Intergenic	OR10H1
chr22	35988635	35990289	1655	348.584	-0.0442912	0.00802891	Distal Intergenic	MB
chr4	160669567	160671054	1488	282.169	-0.0365916	0.00805641	Distal Intergenic	RAPGEF2
chr4	184771414	184774244	2831	2130.79	-0.0344473	0.00804542	Distal Intergenic	STOX2
chr4	23165223	23166862	1640	279.559	-0.0384415	0.00816585	Distal Intergenic	GBA3
chr6	9100082	9101462	1381	338.577	-0.0395736	0.00820055	Distal Intergenic	HULC
chrY	13460018	13461751	1734	481.378	0.0776259	0.00824472	Distal Intergenic	GYG2P1
chr3	158288730	158291037	2308	412.711	-0.0416024	0.00849304	Promoter (<=1kb)	MLF1
chr5	149620413	149621894	1482	400.395	-0.0373162	0.00871155	Intron (uc003lrt.2/815, intron 6 of 18)	CAMK2A
chr4	72741281	72742826	1546	319.457	-0.044817	0.00876392	Distal Intergenic	GC
chr4	89619351	89620833	1483	320.578	-0.0579706	0.00879989	Promoter (<=1kb)	NAP1L5
chr17	6463216	6465684	2469	1038.65	-0.031149	0.00894676	Distal Intergenic	PITPNM3
chr21	11139917	11147200	7284	1373.99	0.0499204	0.00887351	Distal Intergenic	BAGE
chr5	2583890	2586296	2407	705.382	-0.0408876	0.0089875	Distal Intergenic	IRX2
chr6	1204840	1206529	1690	341.148	-0.0415262	0.00902419	Distal Intergenic	LOC285768
chr6	170049373	170051305	1933	652.675	-0.0411149	0.0089959	Intron (uc003qwv.2/253769, intron 10 of 14)	WDR27
chr9	66489789	66491770	1982	333.113	0.0665145	0.00906398	Distal Intergenic	PTGER4P2-CDK2AP2P2
chr1	91852370	91853464	1095	282.832	0.0675359	0.00940933	Intron (uc001doa.4/164045, intron 35 of 38)	HFM1
chr10	79429381	79431512	2132	667.939	-0.0333927	0.00925881	Distal Intergenic	KCNMA1
chr12	2364465	2365772	1308	527.881	0.0737324	0.00938999	Intron (uc001qjz.2/775, intron 3 of 46)	CACNA1C-IT3
chr20	62073523	62075439	1917	344.67	-0.0398583	0.00929646	Exon (uc002yey.1/3785, exon 5 of 17)	KCNQ2
chr3	197899163	197901871	2709	679.893	-0.0358044	0.00932729	Intron (uc011bup.1/728262, intron 6 of 6)	FAM157A
chr9	44142952	44145328	2377	551.844	-0.0430121	0.00939607	Distal Intergenic	CNTNAP3B
chr12	2680919	2682713	1795	464.539	-0.037274	0.00948657	Intron (uc001qjz.2/775, intron 13 of 46)	CACNA1C
chr3	128049180	128050890	1711	291.513	-0.0351451	0.00949938	Intron (uc003eki.3/60678, intron 4 of 6)	DNAJB8-AS1
chr12	131888736	131890309	1574	359.822	-0.0413359	0.00960392	Distal Intergenic	LINC01257
chr14	103384199	103389023	4825	1291.81	-0.0303047	0.00996561	Promoter (<=1kb)	AMN
chr18	106261	111600	5340	6033.24	0.070614	0.00979023	Promoter (<=1kb)	ROCK1P1
chr19	392769	396498	3730	1582.28	-0.0395442	0.00993243	Distal Intergenic	C2CD4C
chr1	1034254	1035441	1188	73.0767	0.130371	7.97632e-06	Intron (uc001acr.2/54991, intron 11 of 11)	C1orf159
chr1	1362073	1362990	918	45.0293	-0.0621409	0.0073761	Promoter (<=1kb)	TMEM88B
chr1	2620955	2623194	2240	172.672	0.0879487	0.00442549	Intron (uc021oey.1/100287898, intron 3 of 6)	MMEL1
chr1	6065839	6066871	1033	61.18	-0.102352	0.000119508	Intron (uc009vlv.2/8514, intron 1 of 15)	NPHP4
chr1	6367365	6369128	1764	134.508	0.0504982	0.00343323	Intron (uc001amq.3/11332, intron 3 of 8)	GPR153
chr1	12704293	12705681	1389	264.083	-0.0439869	0.00253223	Promoter (<=1kb)	AADACL4
chr1	16839159	16840851	1693	168.572	0.0710098	2.1682e-05	Distal Intergenic	CROCCP3
chr1	22076261	22077197	937	59.0656	0.069076	0.00410016	Intron (uc001bfb.3/84196, intron 21 of 26)	USP48
chr1	25834878	25836545	1668	260.638	0.06434	0.00859885	Distal Intergenic	LDLRAP1
chr1	32937169	32937945	777	61.9255	0.0592	0.00593593	Exon (uc001bvl.4/728116, exon 2 of 4)	ZBTB8A
chr1	40440109	40440903	795	57.398	0.0647801	0.000734918	Distal Intergenic	MFSD2A
chr1	43800122	43801246	1125	81.6973	0.0444548	0.00979625	Promoter (2-3kb)	MPL
chr1	47968929	47969803	875	69.3052	0.0514548	0.00314188	Distal Intergenic	FOXD2
chr1	52662811	52663711	901	59.6632	0.0749097	0.00124299	Intron (uc001ctn.4/9372, intron 1 of 4)	ZFYVE9
chr1	53748952	53750172	1221	109.036	0.0669733	0.00198069	Intron (uc001cvh.2/7804, intron 13 of 15)	LRP8
chr1	56472419	56473469	1051	70.7926	0.058449	0.00618099	Distal Intergenic	PPAP2B
chr1	60265747	60266761	1015	81.4573	0.0579028	0.00130494	Distal Intergenic	HOOK1
chr1	78313263	78314572	1310	85.8579	0.0604556	0.00192289	Intron (uc001dhx.4/374986, intron 8 of 15)	NEXN
chr1	85234073	85235011	939	53.826	0.0701959	0.0045584	Distal Intergenic	SSX2IP
chr1	96074264	96075155	892	61.4013	0.0579579	0.00999733	Distal Intergenic	FLJ31662
chr1	107934759	107935819	1061	65.9437	0.0595447	0.000933562	Promoter (1-2kb)	NTNG1
chr1	120632377	120633930	1554	164.419	0.0623597	0.00040065	Distal Intergenic	NOTCH2
chr1	120753358	120755200	1843	175.377	0.0484137	0.00253327	Distal Intergenic	FAM72B
chr1	121160174	121161908	1735	250.609	-0.0469465	0.00811249	Distal Intergenic	SRGAP2D
chr1	121426265	121427479	1215	173.681	0.0891166	0.00347799	Distal Intergenic	EMBP1
chr1	121428404	121429292	889	77.4947	0.151887	0.00949853	Distal Intergenic	EMBP1
chr1	121471445	121472279	835	107.016	0.0829835	0.00170025	Distal Intergenic	EMBP1
chr1	142728733	142730410	1678	150.236	0.0653061	0.00163101	Intron (uc001eiw.1/uc001eiw.1, intron 1 of 7)	ANKRD20A12P
chr1	142951916	142953048	1133	207.859	0.0889349	0.000667551	Intron (uc001eiw.1/uc001eiw.1, intron 1 of 7)	ANKRD20A12P
chr1	144004725	144006922	2198	239.581	0.077359	0.000142707	Intron (uc010oxm.1/uc010oxm.1, intron 1 of 3)	FAM72D
chr1	144189720	144190931	1212	166.441	0.0647662	0.00192848	Promoter (<=1kb)	NBPF20
chr1	144825478	144827805	2328	228.139	0.0899926	0.000327207	Exon (uc010oxn.2/728841, exon 16 of 19)	NBPF9
chr1	146037379	146038149	771	31.9151	0.102597	0.00658734	Exon (uc001eox.3/728912, exon 15 of 19)	NA
chr1	148753334	148755260	1927	168.569	0.0613606	0.00368508	Exon (uc010pba.1/728936, exon 12 of 16)	NA
chr1	149015868	149016964	1097	117.81	0.0552744	0.00437676	Distal Intergenic	LOC645166
chr1	149222490	149224013	1524	171.933	0.0626363	0.00662296	Distal Intergenic	LOC388692
chr1	155903586	155904363	778	47.4678	0.0696524	0.00690957	Promoter (<=1kb)	KIAA0907
chr1	157776692	157777558	867	71.1691	0.0505365	0.00389177	Exon (uc001frg.3/115350, exon 2 of 11)	FCRL1
chr1	200508891	200510250	1360	184.553	-0.0440259	0.00255104	Distal Intergenic	KIF14
chr1	211708002	211708993	992	57.5974	0.0574876	0.00907199	Distal Intergenic	RD3
chr1	213016863	213018255	1393	85.3676	0.0570046	0.00899294	Promoter (2-3kb)	SPATA45
chr1	219252437	219253375	939	64.4368	0.0607191	0.00201217	Distal Intergenic	LYPLAL1-AS1
chr1	223896030	223897335	1306	78.9395	0.0559345	0.00510662	Promoter (2-3kb)	CAPN2
chr1	230712824	230714087	1264	141.164	-0.0584802	0.00223141	Distal Intergenic	COG2
chr1	234271408	234272536	1129	106.664	-0.047914	0.00617808	Intron (uc001hvy.1/148641, intron 2 of 7)	SLC35F3
chr1	246996515	246997618	1104	71.6888	0.0713465	0.000569302	Distal Intergenic	AHCTF1
chr10	1973973	1975317	1345	181.567	-0.0431901	0.00721471	Distal Intergenic	LINC00700
chr10	6688158	6689669	1512	152.892	-0.0793549	0.00533972	Distal Intergenic	PRKCQ-AS1
chr10	12131897	12132897	1001	53.646	0.075659	0.00490874	Intron (uc001ild.5/55526, intron 5 of 16)	DHTKD1
chr10	13992595	13993752	1158	77.7471	0.0550313	0.0034377	Intron (uc001ims.3/55691, intron 23 of 24)	FRMD4A
chr10	28658674	28659738	1065	74.2437	0.0495828	0.00991236	Distal Intergenic	MPP7
chr10	42677851	42679554	1704	160.268	0.0632468	0.00402357	Distal Intergenic	LOC441666
chr10	51501356	51503255	1900	216.181	-0.0371655	0.00688332	Intron (uc001jin.3/uc001jin.3, intron 7 of 7)	AGAP7P
chr10	55259873	55262139	2267	197.821	0.0469909	0.00181152	Distal Intergenic	MBL2
chr10	57048629	57049774	1146	77.9784	0.0548679	0.00168461	Intron (uc001jjv.1/65217, intron 19 of 20)	MTRNR2L5
chr10	62898620	62899710	1091	107.675	-0.056697	0.0026048	Distal Intergenic	RHOBTB1
chr10	65365845	65366477	633	45.5471	0.0745861	0.00257788	Intron (uc001jmt.3/221035, intron 5 of 7)	REEP3
chr10	80035136	80036661	1526	119.285	0.0499148	0.00153566	Intron (uc010qlp.2/100132987, intron 1 of 3)	LINC00595
chr10	80307692	80308946	1255	179.823	-0.0368522	0.00843125	Intron (uc010qlp.2/100132987, intron 3 of 3)	LINC00595
chr10	83425252	83426153	902	55.7422	0.0568959	0.00367063	Distal Intergenic	NRG3
chr10	97256845	97257812	968	63.697	0.072398	0.000402657	Intron (uc001kku.3/10580, intron 25 of 25)	SORBS1
chr10	98316195	98317698	1504	113.967	0.0443906	0.00468418	Intron (uc001kmm.4/56889, intron 10 of 14)	TM9SF3
chr10	106526948	106528051	1104	78.6884	-0.0489913	0.00894778	Intron (uc001kyi.1/22986, intron 1 of 26)	SORCS3
chr10	127574462	127575907	1446	149.235	0.0581031	0.00305323	Intron (uc001ljg.1/55760, intron 11 of 11)	DHX32
chr11	134172	135162	991	75.113	0.0895199	0.000464505	Promoter (<=1kb)	LINC01001
chr11	1417019	1418015	997	49.321	0.0850245	0.00761471	Intron (uc009ycv.1/9024, intron 1 of 19)	BRSK2
chr11	16998370	16999438	1069	64.3027	0.0595628	0.00156204	Intron (uc010rcu.1/144100, intron 24 of 26)	PLEKHA7
chr11	18735929	18737315	1387	116.901	-0.0481665	0.00591051	Exon (uc001mpa.2/283284, exon 11 of 21)	IGSF22
chr11	19631834	19632738	905	65.8908	0.0539584	0.00245662	Intron (uc001mpp.3/89797, intron 1 of 37)	MIR4486
chr11	22553381	22554315	935	73.1026	0.0572695	0.00198751	Distal Intergenic	FANCF
chr11	23516471	23517437	967	70.854	0.0520585	0.00624456	Distal Intergenic	CCDC179
chr11	27554705	27556360	1656	95.9216	0.0552305	0.00279745	Intron (uc001mrm.3/497258, intron 1 of 7)	BDNF-AS
chr11	31135805	31136556	752	46.1029	0.0739652	0.00434686	Intron (uc009yjl.1/100506627, intron 11 of 11)	DCDC5
chr11	34494960	34495670	711	54.8559	0.0570985	0.00451278	Downstream (1-2kb)	CAT
chr11	41676127	41677223	1097	79.3396	0.0465413	0.0099185	Distal Intergenic	LRRC4C
chr11	48962449	48964103	1655	158.812	0.0808573	0.00311354	Distal Intergenic	TRIM49B
chr11	69781595	69782708	1114	61.6044	-0.061932	0.000750414	Distal Intergenic	ANO1
chr11	80038983	80039902	920	62.7117	0.0614971	0.00129215	Distal Intergenic	TENM4
chr11	80199803	80200920	1118	80.773	0.0515014	0.00236709	Distal Intergenic	TENM4
chr11	83818648	83820272	1625	126.647	0.0419484	0.00588842	Intron (uc001pai.2/1740, intron 18 of 19)	DLG2
chr11	84876658	84877769	1112	87.1124	0.0631714	0.000300324	Intron (uc001pak.2/1740, intron 24 of 27)	DLG2
chr11	113804688	113805561	874	50.1367	0.0593424	0.00853229	Intron (uc001pok.3/9177, intron 6 of 8)	HTR3B
chr11	114317709	114318597	889	49.2706	0.0581089	0.00758617	Exon (uc001poy.3/25996, exon 6 of 7)	REXO2
chr11	115597225	115598418	1194	113.376	-0.050247	0.0026244	Distal Intergenic	LINC00900
chr11	115761192	115762357	1166	82.4894	0.0525391	0.00322828	Distal Intergenic	LINC00900
chr11	122327262	122328590	1329	142.99	-0.0426976	0.0042711	Distal Intergenic	MIR100HG
chr11	123582075	123583201	1127	95.1033	0.0530189	0.00798384	Distal Intergenic	ZNF202
chr11	129629669	129630774	1106	75.8116	0.0541832	0.00693611	Distal Intergenic	TMEM45B
chr11	133961984	133964465	2482	185.37	0.0473087	0.00147763	Intron (uc001qhb.3/83700, intron 1 of 8)	JAM3
chr12	7294638	7295993	1356	114.567	-0.050458	0.00943445	Exon (uc001qsr.3/9746, exon 10 of 18)	CLSTN3
chr12	16411712	16412880	1169	102.022	-0.0542584	0.00691414	Intron (uc021qvs.1/729025, intron 7 of 8)	SLC15A5
chr12	17330443	17331488	1046	94.3558	0.0767454	0.000950779	Distal Intergenic	SKP1P2
chr12	20542741	20543737	997	68.4676	0.060581	0.00242662	Intron (uc001reh.2/5139, intron 1 of 15)	PDE3A
chr12	34841207	34842501	1295	137.641	0.0786601	0.00174703	Distal Intergenic	ALG10
chr12	38114651	38115789	1139	134.903	0.0711151	0.00945679	Distal Intergenic	ALG10B
chr12	38207513	38208224	712	48.6233	0.0739232	0.00298403	Distal Intergenic	ALG10B
chr12	42610032	42610969	938	68.2605	0.0563881	0.00306955	Intron (uc001rmv.3/10138, intron 2 of 3)	YAF2
chr12	66859147	66860240	1094	79.0177	0.0523006	0.0063737	Promoter (<=1kb)	GRIP1
chr12	76218875	76220459	1585	116.656	0.0398743	0.00647968	Distal Intergenic	PHLDA1
chr12	81477886	81478926	1041	70.1851	0.0538311	0.00449413	Intron (uc001szl.1/79611, intron 1 of 15)	ACSS3
chr12	95777812	95778768	957	54.8217	0.0575883	0.00902209	Distal Intergenic	MIR3685
chr12	105880147	105881542	1396	101.235	0.0505684	0.00418448	Distal Intergenic	C12orf75
chr12	107616713	107617687	975	69.7558	0.0598366	0.00645704	Distal Intergenic	BTBD11
chr12	114139406	114140606	1201	128.89	0.0965526	0.000172317	Distal Intergenic	LHX5
chr12	123758824	123759921	1098	57.8579	0.059855	0.00230687	Promoter (1-2kb)	CDK2AP1
chr12	127067411	127069112	1702	108.101	0.0775112	0.000179751	Distal Intergenic	LOC100128554
chr12	128224139	128225274	1136	82.155	0.0451423	0.00728425	Distal Intergenic	FLJ37505
chr12	129455337	129456582	1246	125.233	-0.0543065	0.00267166	Intron (uc001uhx.1/144423, intron 7 of 7)	GLT1D1
chr12	131499350	131500661	1312	176.383	-0.0535828	0.00130911	Intron (uc001uit.4/283383, intron 13 of 24)	ADGRD1
chr13	20370105	20371267	1163	105.569	0.0765082	0.00106051	Distal Intergenic	PSPC1
chr13	23507228	23509018	1791	233.425	-0.0359728	0.00491134	Distal Intergenic	BASP1P1
chr13	27164733	27166248	1516	102.343	0.0400107	0.00952696	Intron (uc001uqv.3/10810, intron 1 of 9)	WASF3
chr13	29161004	29162113	1110	71.9194	0.0656538	0.000434294	Distal Intergenic	POMP
chr13	60842940	60844282	1343	83.2734	0.0473395	0.00848141	Distal Intergenic	DIAPH3
chr13	63620869	63622283	1415	130.642	0.0751113	0.000967958	Distal Intergenic	OR7E156P
chr13	63643611	63645786	2176	212.775	0.0635733	0.00546586	Distal Intergenic	OR7E156P
chr13	78997840	78998991	1152	64.6307	-0.237544	0.00382139	Intron (uc001vks.3/100874222, intron 2 of 2)	POU4F1
chr13	112349133	112350224	1092	63.0776	0.0569882	0.00266354	Distal Intergenic	SOX1
chr13	113457632	113459096	1465	178.779	-0.060912	0.00997072	Intron (uc001vsi.4/23250, intron 2 of 29)	ATP11A
chr14	31158354	31159450	1097	83.2524	0.0694302	0.00154699	Intron (uc010amd.2/23256, intron 13 of 17)	SCFD1
chr14	32834585	32835787	1203	78.4609	0.0510688	0.00636525	Intron (uc010aml.3/9472, intron 1 of 9)	AKAP6
chr14	37468568	37470611	2044	105.309	0.0583069	0.00140642	Intron (uc001wtz.2/89874, intron 9 of 9)	MIR4503
chr14	39058684	39059852	1169	108.451	-0.0429653	0.0089171	Distal Intergenic	LINC00639
chr14	62118724	62119989	1266	85.6556	0.0499037	0.00872951	Intron (uc021rtz.1/400221, intron 2 of 2)	HIF1A
chr14	79017348	79018605	1258	168.415	-0.041214	0.004286	Intron (uc001xum.2/9369, intron 4 of 20)	NRXN3
chr14	81648592	81649579	988	52.4897	0.0618921	0.00738381	Intron (uc001xve.2/2957, intron 1 of 9)	SNORA79
chr14	84970129	84971695	1567	149.13	0.0382642	0.00463295	Distal Intergenic	LINC00911
chr14	93143665	93145488	1824	222.559	-0.0473885	0.00213446	Intron (uc001yap.3/79890, intron 8 of 9)	RIN3
chr14	94339038	94340265	1228	72.8248	0.0529488	0.00389759	Distal Intergenic	FAM181A
chr14	98538319	98539399	1081	74.9404	0.0460626	0.00831875	Distal Intergenic	LINC01550
chr15	20025335	20026462	1128	121.57	0.0876136	0.00208038	Distal Intergenic	CHEK2P2
chr15	20144073	20146428	2356	238.646	0.0559596	0.00255148	Distal Intergenic	CHEK2P2
chr15	22323187	22325101	1915	244.606	-0.0523393	0.00787284	Intron (uc001ytz.1/727924, intron 4 of 6)	LOC727924
chr15	23133084	23134118	1035	65.9251	0.0533819	0.00470109	Distal Intergenic	LOC283683
chr15	30918213	30919386	1174	78.7112	0.0501345	0.00610456	Promoter (<=1kb)	ARHGAP11B
chr15	53408628	53410178	1551	209.449	-0.0490792	0.00779797	Distal Intergenic	ONECUT1
chr15	59118635	59119619	985	66.002	0.047518	0.00972538	Intron (uc002afi.3/54629, intron 5 of 8)	FAM63B
chr15	59358734	59360043	1310	172.821	-0.037883	0.00557538	Promoter (<=1kb)	RNF111
chr15	66975449	66976419	971	65.6879	0.0569263	0.00304775	Exon (uc002aqe.3/uc002aqe.3, exon 4 of 5)	SMAD6
chr15	73364968	73366158	1191	92.7999	0.0533102	0.00806807	Intron (uc002avm.4/4756, intron 1 of 28)	NEO1
chr15	76733339	76734502	1164	58.552	0.0570967	0.00857007	Intron (uc010bkr.3/49855, intron 6 of 14)	SCAPER
chr15	83817853	83819106	1254	95.2313	0.0480127	0.00550288	Intron (uc002bjs.2/50810, intron 1 of 5)	TM6SF1
chr15	93312245	93313076	832	46.243	0.0844378	0.000386842	Distal Intergenic	ASB9P1
chr15	101260077	101261132	1056	70.2596	-0.0523231	0.0067551	Distal Intergenic	ASB7
chr16	1043254	1044538	1285	134.458	-0.0426201	0.00890827	Distal Intergenic	SOX8
chr16	2836551	2837773	1223	96.7556	-0.0571895	0.00306714	Promoter (<=1kb)	PRSS33
chr16	6050232	6051296	1065	62.5637	-0.0631116	0.00246509	Distal Intergenic	RBFOX1
chr16	7016146	7017565	1420	99.2429	0.0519871	0.0027616	Intron (uc002cyr.1/54715, intron 3 of 11)	RBFOX1
chr16	7699462	7700619	1158	129.03	-0.0610097	0.000579098	Intron (uc002cyr.1/54715, intron 11 of 11)	RBFOX1
chr16	9246630	9247974	1345	88.8394	0.0821921	0.0037116	Distal Intergenic	C16orf72
chr16	10573789	10574664	876	52.4714	0.0601168	0.0040869	Intron (uc002czu.3/80063, intron 10 of 11)	ATF7IP2
chr16	21513918	21515188	1271	106.226	0.0525132	0.00239688	Intron (uc021tel.1/uc021tel.1, intron 2 of 3)	SMG1P3
chr16	21998452	21999639	1188	62.7179	0.0705661	0.00492311	Intron (uc002dka.2/255762, intron 1 of 4)	PDZD9
chr16	22544860	22546816	1957	172.151	0.0493423	0.00913789	Promoter (2-3kb)	NPIPB5
chr16	28041623	28043243	1621	172.351	-0.042846	0.00262665	Intron (uc002doz.2/146395, intron 6 of 6)	GSG1L
chr16	30937498	30938435	938	58.0863	0.0622496	0.00343222	Promoter (1-2kb)	FBXL19
chr16	33846807	33847504	698	79.3808	0.0743092	0.00705108	Distal Intergenic	LINC00273
chr16	33918092	33919940	1849	254.897	0.0777908	0.00500179	Distal Intergenic	LINC00273
chr16	34003654	34004693	1040	131.236	0.0978869	0.00106533	Distal Intergenic	LINC00273
chr16	34021465	34023109	1645	146.513	0.0802465	0.00678963	Distal Intergenic	LINC00273
chr16	46479610	46480651	1042	153.66	0.0865092	0.000241999	Distal Intergenic	ANKRD26P1
chr16	50646158	50647385	1228	74.0334	0.0593927	0.00786553	Intron (uc002egg.2/85407, intron 4 of 9)	NKD1
chr16	57267337	57268441	1105	67.1957	0.056402	0.00433852	Intron (uc002elb.3/89970, intron 13 of 14)	ARL2BP
chr16	59328924	59330133	1210	185.193	-0.0460598	0.00934628	Distal Intergenic	APOOP5
chr16	65181485	65182274	790	52.955	0.0535535	0.00707657	Distal Intergenic	CDH11
chr16	66528797	66530110	1314	246.818	-0.0462474	0.00949802	Intron (uc021tjp.1/7084, intron 4 of 5)	BEAN1
chr16	85433590	85434650	1061	87.876	0.055267	0.000775925	Distal Intergenic	MIR5093
chr16	86900341	86901647	1307	105.239	0.0457157	0.00463653	Distal Intergenic	FOXL1
chr16	87672756	87673677	922	54.8028	0.0557003	0.00890476	Intron (uc010vou.2/57338, intron 1 of 5)	JPH3
chr17	105669	107523	1855	108.769	-0.0712757	0.00774181	Intron (uc010vpy.2/9501, intron 3 of 6)	RPH3AL
chr17	137787	138968	1182	130.736	0.105997	0.000138999	Intron (uc010vpy.2/9501, intron 4 of 6)	RPH3AL
chr17	13213534	13214401	868	54.7829	0.0639088	0.00906299	Distal Intergenic	HS3ST3A1
chr17	18988622	18989962	1341	119.149	0.0514848	0.0074356	Distal Intergenic	GRAP
chr17	19133251	19133938	688	51.3535	0.0808287	0.00571313	Distal Intergenic	EPN2
chr17	40316894	40318434	1541	89.4267	0.0565802	0.00514984	Exon (uc002hzb.2/23415, exon 10 of 17)	RAB5C
chr17	45864886	45865962	1077	92.0297	-0.0464215	0.00427233	Distal Intergenic	OSBPL7
chr17	53285351	53286555	1205	94.5439	-0.053992	0.00328394	Distal Intergenic	HLF
chr17	54052816	54054094	1279	89.1437	0.0492791	0.00284315	Distal Intergenic	ANKFN1
chr17	60057241	60058250	1010	68.5332	0.0596834	0.00235013	Intron (uc002izo.3/9969, intron 14 of 29)	MED13
chr17	64971922	64973215	1294	192.571	-0.0350348	0.00908205	Intron (uc002jft.2/27092, intron 1 of 3)	CACNG4
chr17	77672819	77673946	1128	76.6792	0.0566307	0.00354122	Distal Intergenic	MIR4739
chr17	80104511	80107295	2785	227.394	-0.0520615	0.00186536	Promoter (2-3kb)	CCDC57
chr18	9088490	9089590	1101	62.5814	0.0810136	0.00016524	Distal Intergenic	NDUFV2
chr18	22328040	22329299	1260	92.7343	-0.0524916	0.00289005	Distal Intergenic	LOC729950
chr18	26974090	26975061	972	71.9626	0.0626894	0.00215395	Distal Intergenic	MIR302F
chr18	42786765	42787967	1203	186.813	-0.0431528	0.00746812	Intron (uc002lbb.3/8170, intron 3 of 13)	SLC14A2
chr18	44204302	44205095	794	49.8543	0.0617225	0.00875537	Intron (uc010xcw.1/125336, intron 36 of 39)	LOXHD1
chr18	44534535	44535626	1092	72.5994	0.0497142	0.0092352	Intron (uc010dnq.1/83473, intron 3 of 6)	KATNAL2
chr18	56601878	56603113	1236	95.3097	-0.0498343	0.00399908	Intron (uc002lho.3/55205, intron 5 of 10)	ZNF532
chr18	59958883	59959764	882	71.7425	0.0527139	0.00747076	Intron (uc002lil.3/57614, intron 27 of 28)	TNFRSF11A
chr18	60829442	60830945	1504	95.5855	0.0434455	0.00890216	Intron (uc002lit.1/596, intron 1 of 2)	BCL2
chr18	62477979	62478980	1002	56.0098	0.0924883	3.93857e-05	Distal Intergenic	LINC01538
chr18	75989487	75990411	925	60.8283	-0.0562414	0.00922701	Distal Intergenic	SALL3
chr18	76196872	76198505	1634	198.961	0.075031	0.00429281	Distal Intergenic	SALL3
chr18	77317243	77318617	1375	256.056	-0.0489856	0.00135469	Distal Intergenic	NFATC1
chr19	139888	141384	1497	104.793	0.0731578	0.00178662	Distal Intergenic	OR4F17
chr19	210298	211499	1202	79.3205	0.0843519	0.000107094	Distal Intergenic	LINC01002
chr19	544318	545596	1279	237.318	-0.0685195	2.18686e-05	Promoter (<=1kb)	GZMM
chr19	1669104	1670608	1505	211.526	-0.0487653	0.00274805	Distal Intergenic	TCF3
chr19	5439957	5441105	1149	88.5767	0.0568494	0.00954669	Distal Intergenic	ZNRF4
chr19	8182485	8183842	1358	95.9806	0.045102	0.00665093	Exon (uc002mjf.3/84467, exon 25 of 63)	FBN3
chr19	14433085	14433906	822	62.5794	0.0550966	0.0047783	Distal Intergenic	ADGRE5
chr19	15645899	15647590	1692	110.022	0.0518895	0.00241888	Intron (uc002nbh.4/126410, intron 4 of 13)	CYP4F22
chr19	19995652	19996522	871	44.3929	0.0658823	0.00784979	Intron (uc002noj.3/56242, intron 3 of 3)	ZNF93
chr19	24601100	24602595	1496	189.66	0.0824786	0.0037977	Distal Intergenic	HAVCR1P1
chr19	24613693	24615229	1537	234.293	0.0871094	0.00250593	Distal Intergenic	HAVCR1P1
chr19	27874298	27877203	2906	254.766	0.0831789	0.0050523	Distal Intergenic	LINC00662
chr19	30621140	30622578	1439	211.469	-0.0736645	0.000100241	Distal Intergenic	URI1
chr19	31190392	31191804	1413	220.393	-0.0597184	0.000565616	Distal Intergenic	ZNF536
chr19	37760097	37762452	2356	182.664	0.0978762	0.0015705	Promoter (<=1kb)	LOC284412
chr19	40722528	40723289	762	53.6367	0.0586746	0.00616858	Promoter (1-2kb)	TTC9B
chr19	40724578	40725662	1085	55.5774	0.0799838	0.0012513	Promoter (<=1kb)	TTC9B
chr19	42786995	42788034	1040	66.8582	-0.0488139	0.00793886	Promoter (<=1kb)	CIC
chr19	42952232	42954323	2092	145.201	0.0464446	0.00191308	Intron (uc010eif.2/100996307, intron 1 of 2)	CXCL17
chr19	50607136	50608673	1538	147.633	0.0786776	0.0057796	Promoter (<=1kb)	SNAR-A3
chr2	1561412	1563005	1594	106.784	-0.0532075	0.00891847	Distal Intergenic	TPO
chr2	2909978	2911287	1310	84.6584	-0.0738769	0.00173855	Intron (uc002qxh.1/uc002qxh.1, intron 2 of 6)	TSSC1
chr2	6953201	6954424	1224	191.054	-0.0514917	0.00311417	Distal Intergenic	CMPK2
chr2	22727127	22728051	925	62.7886	0.0643057	0.00267892	Distal Intergenic	LOC645949
chr2	41213539	41214756	1218	77.2105	0.068835	0.0011028	Distal Intergenic	SLC8A1
chr2	65796363	65797561	1199	92.12	0.0612283	0.00138627	Intron (uc010fcy.1/uc010fcy.1, intron 4 of 9)	SPRED2
chr2	73505749	73506970	1222	96.2515	0.0452291	0.00473168	Distal Intergenic	FBXO41
chr2	75334232	75335172	941	63.1442	0.0570489	0.00226384	Intron (uc002sng.2/6869, intron 3 of 4)	MIR5000
chr2	87318375	87319644	1270	202.657	-0.0394245	0.00482623	Intron (uc002srs.4/64795, intron 2 of 10)	LOC285074
chr2	87616312	87617244	933	102.415	0.0835145	0.000306995	Intron (uc002srs.4/64795, intron 3 of 10)	LINC00152
chr2	87623223	87624681	1459	220.04	0.0756608	0.000640426	Intron (uc002srs.4/64795, intron 3 of 10)	LINC00152
chr2	87651454	87652355	902	62.0404	0.0945964	0.000332509	Intron (uc002srs.4/64795, intron 3 of 10)	LINC00152
chr2	87655384	87656800	1417	124.814	0.0710979	0.00581542	Intron (uc002srs.4/64795, intron 3 of 10)	LINC00152
chr2	97832841	97834035	1195	112.591	0.0853719	0.00156791	Exon (uc010fic.2/375248, exon 17 of 28)	ANKRD36
chr2	103596440	103598616	2177	153.29	0.0461581	0.000837045	Distal Intergenic	TMEM182
chr2	106292887	106293660	774	57.8527	0.0572851	0.00892289	Distal Intergenic	LOC285000
chr2	112079730	112080819	1090	90.4209	0.0521192	0.0018062	Promoter (1-2kb)	MIR4435-1
chr2	126939384	126940396	1013	90.2063	0.0856496	0.00061789	Distal Intergenic	GYPC
chr2	138059183	138060452	1270	88.4793	0.0606603	0.0033457	Intron (uc010zbj.1/80731, intron 6 of 8)	THSD7B
chr2	139568965	139569929	965	53.4319	0.0749211	0.00885645	Distal Intergenic	NXPH2
chr2	152109650	152110709	1060	69.918	0.0514281	0.00605881	Intron (uc002txh.3/375287, intron 2 of 3)	RBM43
chr2	160930214	160931960	1747	136.79	0.0455518	0.00149652	Distal Intergenic	PLA2R1
chr2	167018748	167019705	958	61.0816	0.0588082	0.00395742	Intron (uc002udp.3/uc002udp.3, intron 2 of 11)	SCN1A
chr2	185874162	185875142	981	73.8674	0.0497158	0.00606774	Distal Intergenic	ZNF804A
chr2	211422290	211423159	870	53.8038	0.0575304	0.0021496	Promoter (<=1kb)	CPS1
chr2	221687679	221689057	1379	202.763	-0.055252	0.00414992	Distal Intergenic	EPHA4
chr2	228998278	228999501	1224	167.266	-0.0388672	0.00816132	Intron (uc002vpp.2/80309, intron 10 of 10)	SPHKAP
chr2	237423561	237425228	1668	156.509	-0.042651	0.00182607	Distal Intergenic	IQCA1
chr2	239691527	239692477	951	61.1714	0.0799766	0.0072335	Distal Intergenic	TWIST2
chr2	240860836	240862055	1220	193.033	-0.0545757	0.00251301	Distal Intergenic	MIR4786
chr20	970572	971688	1117	62.6986	-0.0805715	0.000132898	Intron (uc002wej.3/343637, intron 4 of 4)	RSPO4
chr20	1808958	1810199	1242	160.593	-0.0460978	0.00443577	Distal Intergenic	LOC100289473
chr20	2692215	2693944	1730	112.052	0.0480237	0.00700775	Intron (uc002wgs.4/57593, intron 7 of 17)	EBF4
chr20	6679639	6680719	1081	93.3005	-0.0488184	0.00767829	Distal Intergenic	BMP2
chr20	13790087	13792431	2345	162.977	0.0499242	0.000541895	Intron (uc002wom.3/79133, intron 8 of 10)	NDUFAF5
chr20	20590709	20591890	1182	91.262	0.0519336	0.00175139	Intron (uc002wry.3/57186, intron 25 of 29)	RALGAPA2
chr20	24373832	24374786	955	54.9016	0.0570518	0.00879339	Distal Intergenic	SYNDIG1
chr20	25826220	25827489	1270	93.6363	0.0638292	0.000248216	Exon (uc031rsn.1/uc031rsn.1, exon 3 of 3)	FAM182B
chr20	26317412	26319135	1724	237.136	0.0847992	0.00322654	Distal Intergenic	MIR663AHG
chr20	40720215	40721233	1019	76.3532	0.0480153	0.00723721	Intron (uc010ggi.3/11122, intron 4 of 15)	PTPRT
chr20	54438858	54440151	1294	158.091	0.0932302	0.000706351	Distal Intergenic	CBLN4
chr20	61083860	61085819	1960	123.674	-0.0714996	0.000517791	Distal Intergenic	GATA5
chr21	9645796	9646917	1122	114.44	0.0803454	0.00131532	Distal Intergenic	MIR3648-1
chr21	16524710	16525930	1221	83.178	0.0442878	0.0096632	Distal Intergenic	NRIP1
chr21	31489137	31491180	2044	113.517	0.0437686	0.00905676	Distal Intergenic	CLDN17
chr21	39354805	39356063	1259	238.757	-0.0385837	0.00469045	Distal Intergenic	KCNJ6
chr21	42845694	42847848	2155	102.233	-0.0498642	0.00794959	Intron (uc010gor.3/7113, intron 6 of 13)	TMPRSS2
chr21	45942842	45945181	2340	181.064	0.0462894	0.00833318	Intron (uc002zfe.1/54084, intron 4 of 11)	TSPEAR-AS2
chr22	17351489	17353170	1682	174.33	0.0752317	8.02852e-06	Distal Intergenic	HSFY1P1
chr22	36829671	36830584	914	54.3919	0.0626007	0.00824911	Distal Intergenic	MYH9
chr22	46694454	46695236	783	64.6626	0.053099	0.00692614	Promoter (1-2kb)	GTSE1
chr22	47586885	47588258	1374	189.808	-0.0487089	0.0037948	Distal Intergenic	TBC1D22A
chr3	7828072	7829472	1401	92.0631	0.0588939	0.000857031	Distal Intergenic	GRM7
chr3	9680269	9681225	957	59.233	0.0578449	0.00521227	Distal Intergenic	MTMR14
chr3	23167830	23169334	1505	79.6249	0.0657836	0.000185911	Distal Intergenic	UBE2E2
chr3	31465723	31466898	1176	121.018	-0.0644104	0.000714537	Distal Intergenic	STT3B
chr3	39823690	39824699	1010	75.1048	0.0599217	0.00253322	Distal Intergenic	MYRIP
chr3	48231751	48232689	939	59.6344	0.0530876	0.00713852	Promoter (1-2kb)	CDC25A
chr3	75392862	75393725	864	50.7681	0.0648238	0.00582891	Distal Intergenic	FAM86DP
chr3	75695128	75696298	1171	113.941	0.0875889	0.000441857	Distal Intergenic	MIR1324
chr3	75736662	75738283	1622	215.167	0.0814424	0.00514126	Distal Intergenic	LINC00960
chr3	75993563	75996291	2729	269.625	0.0511643	0.00953673	Intron (uc021xat.1/6092, intron 1 of 25)	ROBO2
chr3	75997720	75998844	1125	124.948	0.0853777	0.000128663	Intron (uc021xat.1/6092, intron 1 of 25)	ROBO2
chr3	90456891	90457955	1065	96.812	0.084471	0.00564652	Distal Intergenic	EPHA3
chr3	99947629	99948869	1241	167.317	-0.0382111	0.0077917	Distal Intergenic	TBC1D23
chr3	102756920	102758057	1138	106.588	-0.0469943	0.00846305	Distal Intergenic	ZPLD1
chr3	107160029	107161071	1043	70.2292	0.0492965	0.00988289	Intron (uc003dwj.3/uc003dwj.3, intron 1 of 2)	CCDC54
chr3	107242300	107243442	1143	84.2101	-0.050463	0.00378292	Promoter (<=1kb)	BBX
chr3	114193180	114194316	1137	77.2225	0.0494799	0.00344713	Intron (uc003ebj.3/26137, intron 4 of 5)	ZBTB20
chr3	125583109	125584679	1571	114.099	0.0425371	0.00425004	Distal Intergenic	FAM86JP
chr3	128281457	128282364	908	39.6238	0.100771	0.000556935	Distal Intergenic	LINC01565
chr3	130179067	130180267	1201	114.887	-0.0537724	0.00157581	Intron (uc010hti.2/256076, intron 37 of 41)	COL6A5
chr3	130342250	130343633	1384	99.1953	0.0488348	0.00441084	Intron (uc010htl.3/131873, intron 23 of 35)	COL6A6
chr3	134932448	134933331	884	60.0245	0.0481559	0.00968476	Intron (uc003eqt.3/2047, intron 12 of 15)	EPHB1
chr3	141383315	141385367	2053	212.954	-0.0460538	0.00964911	Distal Intergenic	RNF7
chr3	141478241	141479594	1354	144.189	0.0631318	0.00713085	Distal Intergenic	GRK7
chr3	149095588	149096995	1408	195.032	-0.0430249	0.00231308	Promoter (<=1kb)	TM4SF1
chr3	156789162	156790609	1448	259.551	-0.040273	0.00768371	Distal Intergenic	LINC00881
chr3	164982798	164984098	1301	82.1406	-0.059775	0.00824932	Distal Intergenic	SLITRK3
chr3	196675320	196676375	1056	51.936	-0.0944361	8.23741e-06	Exon (uc003fxh.3/80235, exon 3 of 3)	NCBP2-AS2
chr3	197767005	197768240	1236	84.371	0.0476997	0.00752299	3' UTR	ANKRD18DP
chr4	557459	559949	2491	187.89	0.0460355	0.00974676	Distal Intergenic	PDE6B
chr4	1384346	1385463	1118	92.7476	0.0605875	0.00656309	Promoter (<=1kb)	CRIPAK
chr4	3100904	3101869	966	64.5754	0.0553355	0.00448053	Exon (uc021xkv.1/3064, exon 3 of 67)	HTT
chr4	5641311	5642672	1362	186.561	-0.0526412	0.0028052	5' UTR	EVC2
chr4	6661593	6663059	1467	268.611	-0.0416096	0.000780067	Distal Intergenic	LOC93622
chr4	8096402	8097027	626	41.8044	-0.0752191	0.00222276	Intron (uc003gkj.4/84448, intron 18 of 20)	ABLIM2
chr4	8996068	8997360	1293	81.8946	0.065408	0.00078116	Distal Intergenic	LOC650293
chr4	20243292	20244100	809	61.5527	0.0541965	0.00918449	Distal Intergenic	SLIT2
chr4	22419538	22420612	1075	75.5898	0.0614713	0.00330158	Intron (uc010ieo.2/166647, intron 7 of 16)	ADGRA3
chr4	24496542	24497791	1250	160.173	-0.056955	0.00306516	Distal Intergenic	PPARGC1A
chr4	24673216	24674207	992	62.4122	0.0514498	0.00778408	Distal Intergenic	DHX15
chr4	28239323	28240477	1155	117.767	-0.0408138	0.00604349	Distal Intergenic	MIR4275
chr4	41161487	41162479	993	61.4256	0.0688542	0.000429952	Intron (uc003gvl.3/323, intron 17 of 17)	APBB2
chr4	56908022	56909331	1310	156.452	-0.0361092	0.00931238	Distal Intergenic	CEP135
chr4	58819069	58820397	1329	120.779	-0.0751699	0.00146105	Distal Intergenic	IGFBP7
chr4	63072385	63073188	804	55.7555	0.0711315	0.000609096	Distal Intergenic	ADGRL3
chr4	117535918	117537299	1382	235.254	-0.0518071	0.000680821	Distal Intergenic	MIR1973
chr4	124939125	124940288	1164	106.866	-0.0805296	6.78496e-07	Distal Intergenic	LINC01091
chr4	132987074	132988261	1188	88.0265	-0.0498603	0.00358995	Distal Intergenic	PCDH10
chr4	136053034	136054222	1189	109.275	-0.0866623	0.00155634	Distal Intergenic	PABPC4L
chr4	150801761	150802931	1171	133.408	-0.0415766	0.00737914	Distal Intergenic	DCLK2
chr4	154142388	154143696	1309	239.605	-0.0711555	0.000957105	Intron (uc003ing.2/23321, intron 1 of 11)	TRIM2
chr4	162704211	162705358	1148	93.1919	-0.0564639	0.0023134	Intron (uc003iqh.4/56884, intron 12 of 15)	FSTL5
chr4	168846404	168848284	1881	138.193	0.0437243	0.00953826	Distal Intergenic	ANXA10
chr4	174352983	174354145	1163	80.4306	-0.0519982	0.00649841	Distal Intergenic	SCRG1
chr4	182162603	182163255	653	55.3517	0.12393	1.06305e-05	Distal Intergenic	LINC00290
chr4	183996368	183997472	1105	85.2531	0.0490106	0.00785107	Distal Intergenic	WWC2-AS2
chr5	2525517	2526676	1160	88.0417	0.0595977	0.00933268	Distal Intergenic	IRX2
chr5	4645227	4646254	1028	64.9794	0.0488265	0.00933389	Distal Intergenic	LINC01020
chr5	7605493	7606363	871	70.081	0.0770706	0.00407028	Intron (uc003jdz.1/108, intron 3 of 24)	ADCY2
chr5	34149883	34151018	1136	126.832	0.0752401	0.00129127	Distal Intergenic	C1QTNF3
chr5	46323965	46324527	563	64.6208	0.0994988	0.000880195	Distal Intergenic	HCN1
chr5	49405519	49406687	1169	226	0.0915753	0.00051649	Distal Intergenic	EMB
chr5	49545286	49546210	925	86.3712	0.0889401	0.00139201	Distal Intergenic	EMB
chr5	50012781	50013748	968	66.3397	0.062185	0.00420905	Intron (uc003jon.4/79668, intron 3 of 26)	PARP8
chr5	52490384	52491412	1029	60.4654	0.0542183	0.00550973	Distal Intergenic	LOC257396
chr5	70429302	70429864	563	23.8568	0.113461	0.00180814	Intron (uc010iyn.3/100049076, intron 3 of 10)	NAIP
chr5	106316370	106318501	2132	189.297	0.0434601	0.00349125	Distal Intergenic	EFNA5
chr5	119442189	119443538	1350	187.783	-0.0447877	0.00219055	Distal Intergenic	PRR16
chr5	125200294	125201430	1137	81.4652	0.0480088	0.0038507	Distal Intergenic	GRAMD3
chr5	147320903	147321674	772	71.6445	0.0840873	0.00573864	Distal Intergenic	C5orf46
chr5	151307417	151308406	990	68.6741	0.0578639	0.00622463	Distal Intergenic	GLRA1
chr5	157382484	157383531	1048	59.3807	0.0543456	0.00684629	Distal Intergenic	CLINT1
chr5	170180763	170182246	1484	129.384	-0.0525506	0.00569085	Distal Intergenic	GABRP
chr5	171070718	171071949	1232	114.163	-0.0437374	0.00462154	Distal Intergenic	FGF18
chr5	178801061	178802131	1071	62.2319	0.0594636	0.00886389	Distal Intergenic	ADAMTS2
chr6	861933	863986	2054	128.311	0.141539	0.00298408	Distal Intergenic	EXOC2
chr6	1926799	1928033	1235	122.392	0.0521089	0.00175563	Intron (uc021ykn.1/2762, intron 4 of 10)	GMDS
chr6	3295389	3296144	756	40.3471	0.0665764	0.00718274	Intron (uc003mvn.3/63027, intron 5 of 10)	PSMG4
chr6	5832199	5833313	1115	84.812	-0.0562436	0.00191843	Distal Intergenic	NRN1
chr6	6278135	6279510	1376	118.478	0.0396529	0.00813682	Intron (uc003mwv.3/2162, intron 12 of 14)	F13A1
chr6	6291092	6292107	1016	72.5789	0.0465542	0.00804263	Intron (uc003mwv.3/2162, intron 12 of 14)	F13A1
chr6	13907633	13908724	1092	80.0082	-0.0507818	0.00634537	Distal Intergenic	RNF182
chr6	20128013	20128884	872	60.4617	0.0715641	0.00326252	Intron (uc003ncx.2/154141, intron 7 of 12)	MBOAT1
chr6	32677151	32678141	991	59.4563	0.0631071	0.00544353	Distal Intergenic	HLA-DQA2
chr6	38581804	38583614	1811	122.646	0.0488907	0.00140106	Intron (uc003ooa.4/114781, intron 11 of 11)	BTBD9
chr6	38674796	38675933	1138	101.607	0.0718875	0.00933119	Distal Intergenic	GLO1
chr6	40864651	40865409	759	44.2956	0.0574271	0.00755237	Distal Intergenic	UNC5CL
chr6	54909965	54911074	1110	126.036	-0.0428294	0.00482549	Distal Intergenic	HCRTR2
chr6	57593339	57595319	1981	205.825	0.0478624	0.00186741	Distal Intergenic	PRIM2
chr6	84246096	84247797	1702	258.036	-0.0433291	0.00318031	Distal Intergenic	PRSS35
chr6	118235990	118237298	1309	74.8948	0.0443844	0.00918239	Intron (uc003pxx.4/222553, intron 1 of 7)	SLC35F1
chr6	119127679	119129262	1584	89.0935	0.0561414	0.000630419	Distal Intergenic	LOC100287632
chr6	123221509	123222932	1424	243.713	-0.0369672	0.00771532	Distal Intergenic	CLVS2
chr6	136051968	136052944	977	78.3128	0.0608978	0.000750731	Distal Intergenic	PDE7B
chr6	139976599	139977746	1148	112.43	-0.0592932	0.000953927	Distal Intergenic	LOC100132735
chr6	150535068	150536233	1166	112.981	-0.0455548	0.0034932	Exon (uc003qnt.3/81706, exon 2 of 4)	PPP1R14C
chr6	150776510	150777749	1240	85.8116	0.0627652	0.00177841	Distal Intergenic	IYD
chr6	157703140	157704749	1610	150.878	-0.0837388	0.00909348	Distal Intergenic	TMEM242
chr6	159902543	159903220	678	32.1632	0.090518	0.00536595	Distal Intergenic	SOD2
chr6	167237702	167238527	826	58.1309	0.059474	0.00549476	Intron (uc003qvc.1/6196, intron 20 of 21)	RPS6KA2
chr6	169331908	169332929	1022	63.6436	0.100452	0.00138033	Distal Intergenic	SMOC2
chr6	170849508	170850506	999	56.0294	0.0557976	0.0058955	Intron (uc003qxq.2/5689, intron 5 of 8)	PSMB1
chr6	170967510	170970139	2630	218.753	0.0761782	8.85038e-06	Distal Intergenic	PDCD2
chr7	5321326	5322568	1243	188.303	-0.0455927	0.00740001	Promoter (<=1kb)	SLC29A4
chr7	6934352	6935272	921	49.7406	-0.0692028	0.00207922	Distal Intergenic	CCZ1B
chr7	23587006	23588077	1072	77.2479	0.0551303	0.00512061	Distal Intergenic	TRA2A
chr7	44987158	44988585	1428	103.298	0.0620125	0.00192548	Distal Intergenic	MYO1G
chr7	53222891	53224101	1211	163.347	0.079418	0.000184122	Distal Intergenic	POM121L12
chr7	57662190	57663253	1064	111.941	0.0459158	0.00330261	Distal Intergenic	ZNF716
chr7	57947121	57948205	1085	140.904	0.0790422	0.000777473	Distal Intergenic	ZNF716
chr7	57996433	57997888	1456	225.077	0.0795545	0.00694529	Distal Intergenic	ZNF716
chr7	61191471	61192133	663	47.5832	0.0990915	0.00540219	Distal Intergenic	ZNF733P
chr7	61794007	61795148	1142	191.775	0.0721918	0.00423412	Distal Intergenic	ZNF733P
chr7	62028434	62030267	1834	178.149	0.0716048	0.00566539	Distal Intergenic	ZNF733P
chr7	64960212	64961754	1543	169.611	0.0700592	0.00756781	Distal Intergenic	ZNF92
chr7	65040969	65042779	1811	133.437	0.069804	0.00892305	Distal Intergenic	INTS4P2
chr7	75709141	75710315	1175	68.2725	0.0601633	0.00568815	Distal Intergenic	MDH2
chr7	76127830	76128881	1052	70.7325	-0.0649963	0.0072885	Promoter (<=1kb)	DTX2
chr7	94018696	94020044	1349	97.2489	0.0449435	0.0087958	Distal Intergenic	COL1A2
chr7	102231804	102233675	1872	130.792	0.0682899	0.000442343	Promoter (<=1kb)	RASA4
chr7	125459970	125461477	1508	183.182	-0.0530414	0.00163922	Distal Intergenic	POT1
chr7	126617796	126618663	868	53.5886	0.0539479	0.00728045	Intron (uc003vlr.2/2918, intron 8 of 9)	MIR592
chr7	127982416	127983354	939	58.7576	0.0647739	0.00171368	Promoter (<=1kb)	RBM28
chr7	131213267	131214266	1000	59.5666	0.0620263	0.00545636	Intron (uc003vqw.4/5420, intron 8 of 8)	PODXL
chr7	131378446	131379349	904	55.5082	0.0572656	0.00656498	Distal Intergenic	PODXL
chr7	135021288	135022356	1069	84.1997	0.0487608	0.00467074	Distal Intergenic	STRA8
chr7	147518380	147519260	881	53.6683	0.0651783	0.00253569	Intron (uc003weu.2/26047, intron 13 of 23)	MIR548I4
chr7	151551664	151553140	1477	140.679	-0.0634296	0.00707389	Intron (uc003wkk.3/51422, intron 15 of 15)	PRKAG2-AS1
chr7	151975379	151977355	1977	211.859	0.065201	0.00231304	Intron (uc003wla.3/58508, intron 53 of 58)	KMT2C
chr7	152434485	152435699	1215	65.1692	0.0635295	0.00842274	Distal Intergenic	ACTR3B
chr7	157222222	157223283	1062	85.0601	-0.0476541	0.00959286	Distal Intergenic	DNAJB6
chr7	158441231	158441917	687	45.1927	0.123838	5.52368e-07	Intron (uc011kwc.1/54892, intron 4 of 14)	NCAPG2
chr8	96097	98127	2031	157.166	0.0924576	2.22901e-05	Distal Intergenic	OR4F21
chr8	756728	758105	1378	191.356	-0.0461749	0.00112236	Intron (uc003wpj.2/619343, intron 1 of 3)	ERICH1-AS1
chr8	2271204	2273053	1850	174.414	0.0452749	0.00296848	Distal Intergenic	MYOM2
chr8	2922378	2923484	1107	83.7576	0.0510813	0.00839766	Intron (uc010lrg.3/64478, intron 18 of 31)	CSMD1
chr8	9595386	9596286	901	57.2935	0.0675936	0.00998548	Promoter (2-3kb)	MIR597
chr8	10530953	10532341	1389	133.388	-0.0437558	0.00518652	Promoter (<=1kb)	C8orf74
chr8	33142986	33144133	1148	113.871	-0.0507053	0.0031296	Distal Intergenic	FUT10
chr8	50102789	50104163	1375	83.3937	0.050846	0.0091662	Distal Intergenic	C8orf22
chr8	50563543	50564554	1012	64.2064	0.0651747	0.000661434	Distal Intergenic	SNTG1
chr8	55273428	55274702	1275	229.09	-0.0474398	0.00912346	Distal Intergenic	SOX17
chr8	59075306	59076557	1252	184.091	-0.040943	0.00434798	Distal Intergenic	FAM110B
chr8	76378202	76379399	1198	136.575	-0.0525022	0.000340017	Intron (uc003yap.1/3174, intron 1 of 3)	HNF4G
chr8	78049652	78050902	1251	146.208	-0.0390538	0.00576328	Distal Intergenic	PEX2
chr8	95466895	95467597	703	48.7652	0.0717881	0.0010524	Intron (uc003ygk.3/25788, intron 12 of 14)	FSBP
chr8	102620804	102621836	1033	68.382	0.0529683	0.00288457	Intron (uc010mbu.3/79977, intron 8 of 15)	GRHL2
chr8	107361771	107362714	944	64.81	0.0524149	0.00744389	Intron (uc003ymf.3/55074, intron 1 of 15)	OXR1
chr8	111967466	111968685	1220	177.178	0.0790445	0.000609286	Distal Intergenic	KCNV1
chr8	112320787	112321695	909	59.2674	0.0506866	0.00771605	Distal Intergenic	CSMD3
chr8	120887236	120888345	1110	66.9236	0.0709403	0.0029751	Promoter (1-2kb)	DEPTOR
chr8	136874261	136875194	934	56.1009	0.0639927	0.00145145	Distal Intergenic	KHDRBS3
chr8	143882767	143884080	1314	101.902	-0.0646066	0.00784344	Distal Intergenic	LY6D
chr8	144743919	144744514	596	43.6166	0.157425	0.00458922	Distal Intergenic	ZNF623
chr8	146196536	146197661	1126	74.7292	0.0604897	0.00147548	Distal Intergenic	ZNF16
chr9	20893	22272	1380	134.503	0.0670248	0.000902056	Promoter (1-2kb)	WASH1
chr9	4307875	4308797	923	68.6961	0.049608	0.00482468	Distal Intergenic	GLIS3
chr9	17489762	17490809	1048	54.4388	0.0795258	0.000853478	Intron (uc003zmy.3/54875, intron 25 of 25)	SH3GL2
chr9	35438564	35439762	1199	85.1577	0.0518564	0.00214221	Exon (uc010mkn.2/158381, exon 5 of 10)	ATP8B5P
chr9	40909694	40910923	1230	64.3827	0.0792368	0.00120542	Distal Intergenic	ZNF658
chr9	67952259	67953605	1347	95.6684	0.0569703	0.00895866	Intron (uc004aeu.3/441425, intron 9 of 14)	ANKRD20A3
chr9	70006021	70007003	983	72.7174	0.106176	0.000297974	Distal Intergenic	FOXD4L5
chr9	70168595	70169767	1173	94.727	0.0680034	0.00832843	Distal Intergenic	FOXD4L5
chr9	70668025	70669265	1241	80.2562	0.0705678	0.00119993	Distal Intergenic	CBWD3
chr9	95772283	95773516	1234	119.801	-0.0829231	0.000252869	Exon (uc004asw.2/89846, exon 7 of 18)	FGD3
chr9	106796697	106797638	942	78.749	0.0460177	0.00949106	Distal Intergenic	SMC2
chr9	112596939	112598068	1130	72.245	-0.0541514	0.00164889	Intron (uc004beg.3/114299, intron 2 of 6)	PALM2-AKAP2
chr9	116448717	116450168	1452	233.361	-0.041711	0.00639768	Distal Intergenic	RGS3
chr9	130880349	130881853	1505	228.352	-0.0338562	0.00793931	Promoter (<=1kb)	SLC25A25-AS1
chr9	137603414	137605035	1622	211.341	-0.0559213	0.00175654	Intron (uc004cfe.4/1289, intron 4 of 65)	COL5A1
chr9	138503176	138504569	1394	134.345	-0.0413872	0.00678991	Distal Intergenic	GLT6D1
chr9	139041840	139043281	1442	210.749	-0.0415887	0.00426522	Distal Intergenic	C9orf69
chrX	323533	324766	1234	114.607	0.0748193	0.00565038	Intron (uc004cpg.3/28227, intron 12 of 12)	PPP2R3B
chrX	733363	734782	1420	187.359	-0.0470429	0.00979527	Distal Intergenic	SHOX
chrX	1472867	1474735	1869	258.508	-0.0413602	0.00668944	Intron (uc004cps.3/3563, intron 6 of 11)	IL3RA
chrX	5726346	5727663	1318	161.89	-0.0751731	0.00247603	Distal Intergenic	NLGN4X
chrX	6318505	6319875	1371	123.812	-0.0672812	0.00603487	Distal Intergenic	MIR4770
chrX	7122076	7123437	1362	173.538	-0.063002	0.00214248	Intron (uc004crw.2/412, intron 2 of 2)	STS
chrX	7539747	7541423	1677	244.966	-0.0775218	0.000970745	Distal Intergenic	VCX
chrX	19665872	19667169	1298	148.177	-0.0740621	0.00435504	Intron (uc011mje.2/30011, intron 12 of 12)	SH3KBP1
chrX	20827615	20828835	1221	108.724	-0.0777433	0.00792433	Distal Intergenic	RPS6KA3
chrX	31213315	31214523	1209	77.2586	-0.0760263	0.0070535	Intron (uc004dcm.1/1756, intron 12 of 17)	DMD
chrX	34793252	34794377	1126	87.1451	-0.0557191	0.00968635	Distal Intergenic	TMEM47
chrX	39020687	39022051	1365	186.7	-0.0679594	0.00625866	Distal Intergenic	LINC01281
chrX	61866052	61867251	1200	123.826	0.0728935	0.00571156	Distal Intergenic	SPIN4
chrX	65296279	65297560	1282	124.242	-0.0728547	0.00174735	Distal Intergenic	VSIG4
chrX	91402381	91403604	1224	166.246	-0.0647519	0.00402067	Intron (uc004efk.2/27328, intron 2 of 6)	PCDH11X
chrX	119828215	119829147	933	43.4919	-0.0844006	0.00551233	Distal Intergenic	C1GALT1C1
chrX	133806702	133807896	1195	142.699	-0.064729	0.00645422	Distal Intergenic	PLAC1
chrX	142796642	142797645	1004	59.795	-0.0909646	0.000437795	Intron (uc004fbz.3/494119, intron 1 of 1)	SPANXN2
chrX	150821972	150822705	734	34.0499	-0.0841537	0.000654905	Intron (uc004fev.4/139135, intron 9 of 15)	PRRG3
chrY	13544533	13545883	1351	83.2148	0.0808327	0.00457136	Distal Intergenic	GYG2P1
chrY	28586984	28588545	1562	142.593	0.0874629	8.59442e-05	Distal Intergenic	TTTY3
